# Supplementary material for: A single cell transcriptional roadmap for cardiopharyngeal fate diversification
Source: bioRxiv or medRxiv preprint supplement (doi:10.1101/150235), 2019-02-19
Supplement: Supplementary file [file 150235-6.pdf]

# Preprocess

Xiang Niu May 11, 2016

## 1. Load packages

```
library(Seurat)
library(pbapply)
library(RColorBrewer)
source("functions.R")
col = colorRampPalette(rev(brewer.pal(n = 10, name = "RdBu")))
```

## 2. Merge Data

```
# read data
hpf12.data = read.table("hpf12.txt", sep = "\t", header = T, row.names = 1)
hpf14.data = read.table("hpf14.txt", sep = "\t", header = T, row.names = 1)
hpf16.data = read.table("hpf16.txt", sep = "\t", header = T, row.names = 1)
hpf18.data = read.table("hpf18.txt", sep = "\t", header = TRUE, row.names = 1)
hpf20.data = read.table("hpf20.txt", sep = "\t", header = TRUE, row.names = 1)

# change the column names
colnames(hpf12.data) = paste("hpf12_", colnames(hpf12.data), sep = "")
colnames(hpf14.data) = paste("hpf14_", colnames(hpf14.data), sep = "")
colnames(hpf16.data) = paste("hpf16_", colnames(hpf16.data), sep = "")
colnames(hpf18.data) = paste("hpf18_", colnames(hpf18.data), sep = "")
colnames(hpf20.data) = paste("hpf20_", colnames(hpf20.data), sep = "")

# pool all cell types
hpfall.data = cbind(hpf12.data, hpf14.data, hpf16.data, hpf18.data, hpf20.data)
dim(hpfall.data)
```

```
## [1] 15287 1796
```

```
# transform data to log scale
hpfall.data = log(hpfall.data + 1)

# setup Seurat object
hpfall = new("seurat", raw.data = hpfall.data)

# Take all genes in > 3 cells, all cells with 2k < detected genes < 6k, use
# an expression threshold of 1 log(FPKM)
```

```

hpf11 = setup(hpf11, project = "allhpf", min.cells = 3, min.genes = 2000,
  is.expr = 1, names.field = 1, names.delim = "_")
hpf11 = subsetData(hpf11, subset.name = "nGene", accept.high = 6000)
hpf11

```

```

## An object of class seurat in project allhpf
## 14864 genes across 1182 samples.

```

### 3. QC of data

```

##### hpf12#####
hpf12summary = list.files(path = "./summary/hpf12summary")
reads12 = NULL
map12 = NULL
cellName12 = substring(which.cells(hpf11, "hpf12"), 7)
hpf12summaryName = gsub("cufflinks", "", cellName12)
hpf12Names = NULL
for (i in hpf12summaryName) {
  hpf12Names = append(hpf12Names, grep(i, hpf12summary))
}
hpf12summary = hpf12summary[hpf12Names]
for (i in hpf12summary) {
  cell = read.csv(paste("./summary/hpf12summary/", i, sep = ""))
  reads = grep("Input", cell$Reads.)
  map = grep("overall", cell$Reads.)
  totReads = as.numeric(substr(as.character(cell$Reads.[reads]), 22, 50))
  mapRates = as.numeric(substr(as.character(cell$Reads.[map]), 1, 4))
  map12 = append(map12, mapRates)
  reads12 = append(reads12, totReads)
}

# Add data infor to Seurat object
hpf11@data.info[, c("map.rate", "reads")] = NA
hpf11@data.info[hpf11@ident == "hpf12", "map.rate"] = map12
hpf11@data.info[hpf11@ident == "hpf12", "reads"] = reads12
##### hpf14#####
hpf14summary = list.files(path = "./summary/hpf14summary")
reads14 = NULL
map14 = NULL
cellName14 = substring(which.cells(hpf11, "hpf14"), 7)
hpf14summaryName = gsub("cufflinks", "", cellName14)
hpf14Names = NULL
for (i in hpf14summaryName) {

```

```

    hpf14Names = append(hpf14Names, grep(i, hpf14summary))
}
hpf14summary = hpf14summary[hpf14Names]
for (i in hpf14summary) {
  cell = read.csv(paste("./summary/hpf14summary/", i, sep = ""))
  reads = grep("Input", cell$Reads.)
  map = grep("overall", cell$Reads.)
  totReads = as.numeric(substr(as.character(cell$Reads.[reads]), 22, 50))
  mapRates = as.numeric(substr(as.character(cell$Reads.[map]), 1, 4))
  map14 = append(map14, mapRates)
  reads14 = append(reads14, totReads)
}

# Add data infor to Seurat object
hpfall@data.info[hpfall@ident == "hpf14", "map.rate"] = map14
hpfall@data.info[hpfall@ident == "hpf14", "reads"] = reads14
##### hpf16#####
hpf16summary = list.files(path = "./summary/hpf16summary")
reads16 = NULL
map16 = NULL
cellName16 = substring(which.cells(hpfall, "hpf16"), 7)
hpf16summaryName = gsub("cufflinks", "", cellName16)
hpf16Names = NULL
for (i in hpf16summaryName) {
  hpf16Names = append(hpf16Names, grep(i, hpf16summary))
}
hpf16summary = hpf16summary[hpf16Names]
for (i in hpf16summary) {
  cell = read.csv(paste("./summary/hpf16summary/", i, sep = ""))
  reads = grep("Input", cell$Reads.)
  map = grep("overall", cell$Reads.)
  totReads = as.numeric(substr(as.character(cell$Reads.[reads]), 22, 50))
  mapRates = as.numeric(substr(as.character(cell$Reads.[map]), 1, 4))
  map16 = append(map16, mapRates)
  reads16 = append(reads16, totReads)
}

# Add data infor to Seurat object
hpfall@data.info[hpfall@ident == "hpf16", "map.rate"] = map16
hpfall@data.info[hpfall@ident == "hpf16", "reads"] = reads16
##### hpf18#####
hpf18summary = list.files(path = "./summary/hpf18summary")
reads18 = NULL
map18 = NULL

```

```

cellName18 = substring(which.cells(hpfall, "hpf18"), 7)
hpf18summaryName = gsub("outcufflinks", "", cellName18)
hpf18Names = NULL
for (i in hpf18summaryName) {
  hpf18Names = append(hpf18Names, grep(i, hpf18summary))
}
hpf18summary = hpf18summary[hpf18Names]
for (i in hpf18summary) {
  cell = read.csv(paste("./summary/hpf18summary/", i, sep = ""))
  reads = grep("Input", cell$Reads.)
  map = grep("overall", cell$Reads.)
  totReads = as.numeric(substr(as.character(cell$Reads.[reads]), 22, 50))
  mapRates = as.numeric(substr(as.character(cell$Reads.[map]), 1, 4))
  map18 = append(map18, mapRates)
  reads18 = append(reads18, totReads)
}

# Add data infor to Seurat object
hpfall@data.info[hpfall@ident == "hpf18", "map.rate"] = map18
hpfall@data.info[hpfall@ident == "hpf18", "reads"] = reads18
##### hpf20#####
hpf20summary = list.files(path = "./summary/hpf20summary")
reads20 = NULL
map20 = NULL
cellName20 = substring(which.cells(hpfall, "hpf20"), 7)
hpf20summaryName = gsub("cufflinks", "", cellName20)
hpf20Names = NULL
for (i in hpf20summaryName) {
  hpf20Names = append(hpf20Names, grep(i, hpf20summary))
}
hpf20summary = hpf20summary[hpf20Names]
for (i in hpf20summary) {
  cell = read.csv(paste("./summary/hpf20summary/", i, sep = ""))
  reads = grep("Input", cell$Reads.)
  map = grep("overall", cell$Reads.)
  totReads = as.numeric(substr(as.character(cell$Reads.[reads]), 22, 50))
  mapRates = as.numeric(substr(as.character(cell$Reads.[map]), 1, 4))
  map20 = append(map20, mapRates)
  reads20 = append(reads20, totReads)
}

# Add data infor to Seurat object
hpfall@data.info[hpfall@ident == "hpf20", "map.rate"] = map20
hpfall@data.info[hpfall@ident == "hpf20", "reads"] = reads20

```

```
##### Plot mappint rates from all t
plot(NULL, xlab = "Mapping Rates", ylab = "Density", xlim = c(0, 100), ylim = c(0,
  0.1), cex.lab = 1.2, font.lab = 2)
points(density(map12), type = "l", col = brewer.pal(5, "Set1")[1], lwd = 3)
points(density(map14), type = "l", col = brewer.pal(5, "Set1")[2], lwd = 3)
points(density(map16), type = "l", col = brewer.pal(5, "Set1")[3], lwd = 3)
points(density(map18), type = "l", col = brewer.pal(5, "Set1")[4], lwd = 3)
points(density(map20), type = "l", col = brewer.pal(5, "Set1")[5], lwd = 3)
legend("topright", legend = c("hpf12", "hpf14", "hpf16", "hpf18", "hpf20"),
  lty = 1, col = brewer.pal(5, "Set1"), cex = 0.75, xpd = T, inset = c(0.1,
  0), bty = "n")
```

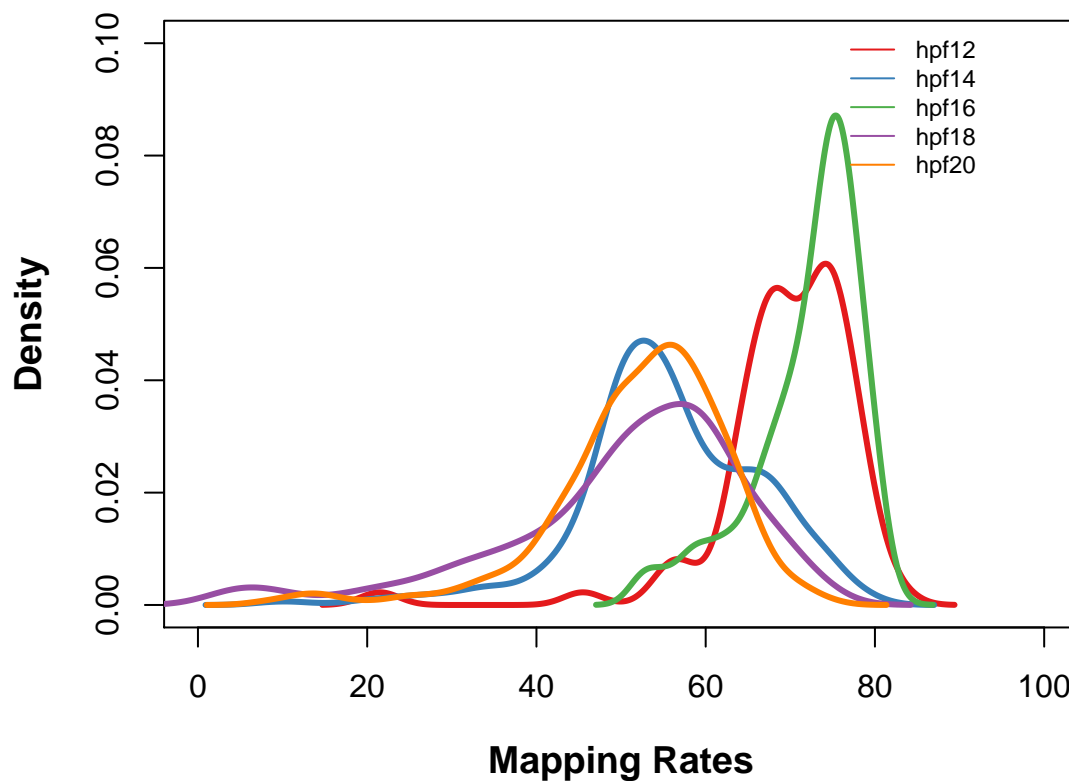

```
# Plot total reads from all data
plot(NULL, xlab = "Total Reads", ylab = "Density", xlim = c(0, 3e+06), ylim = c(0,
  3e-06), cex.lab = 1.2, font.lab = 2)
points(density(reads12), type = "l", col = brewer.pal(5, "Set1")[1], lwd = 3)
points(density(reads14), type = "l", col = brewer.pal(5, "Set1")[2], lwd = 3)
points(density(reads16), type = "l", col = brewer.pal(5, "Set1")[3], lwd = 3)
points(density(reads18), type = "l", col = brewer.pal(5, "Set1")[4], lwd = 3)
points(density(reads20), type = "l", col = brewer.pal(5, "Set1")[5], lwd = 3)
legend("topright", legend = c("hpf12", "hpf14", "hpf16", "hpf18", "hpf20"),
  lty = 1, col = c("red", "blue", "yellow", "green", "black"), cex = 0.75,
  xpd = T, inset = c(0.1, 0), bty = "n")
```

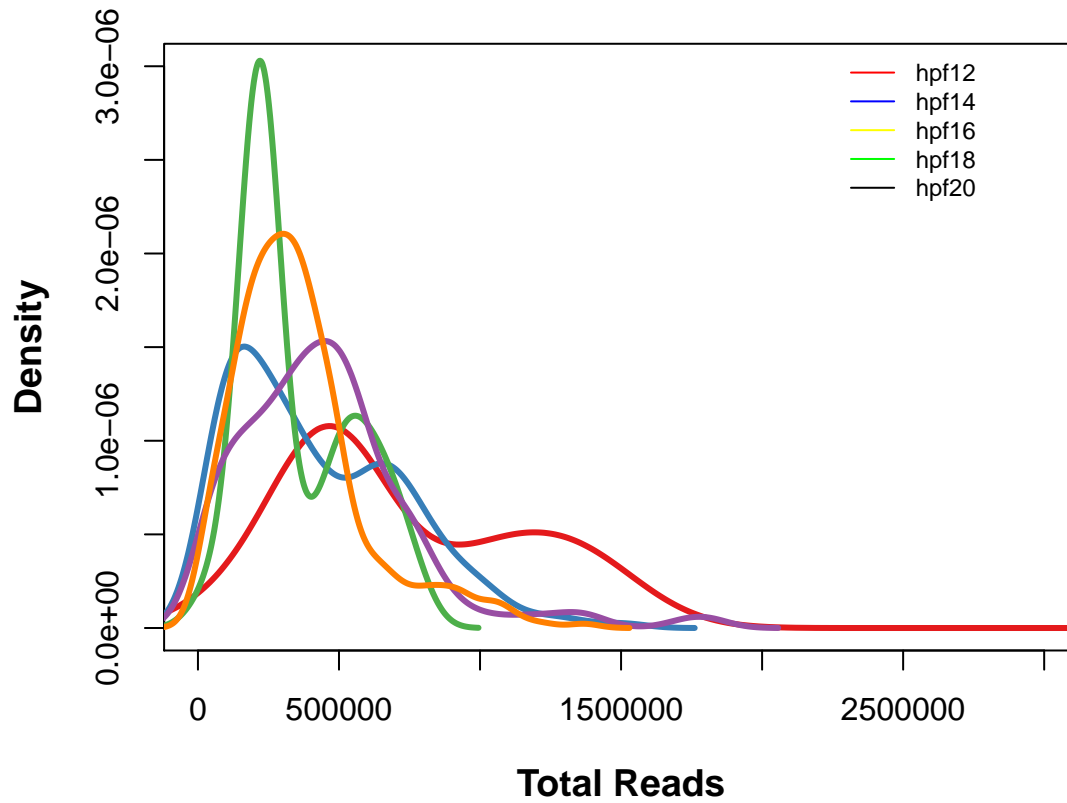

```
# Remove cells with mapping rate < 30%, reads > 2*10^6
boxPlot.FPKM(hpfall, "map.rate", name.y = "Mapping Rate(%)", ratio.plot = 0.06,
name.x = "", name = "Mapping Rates")
```

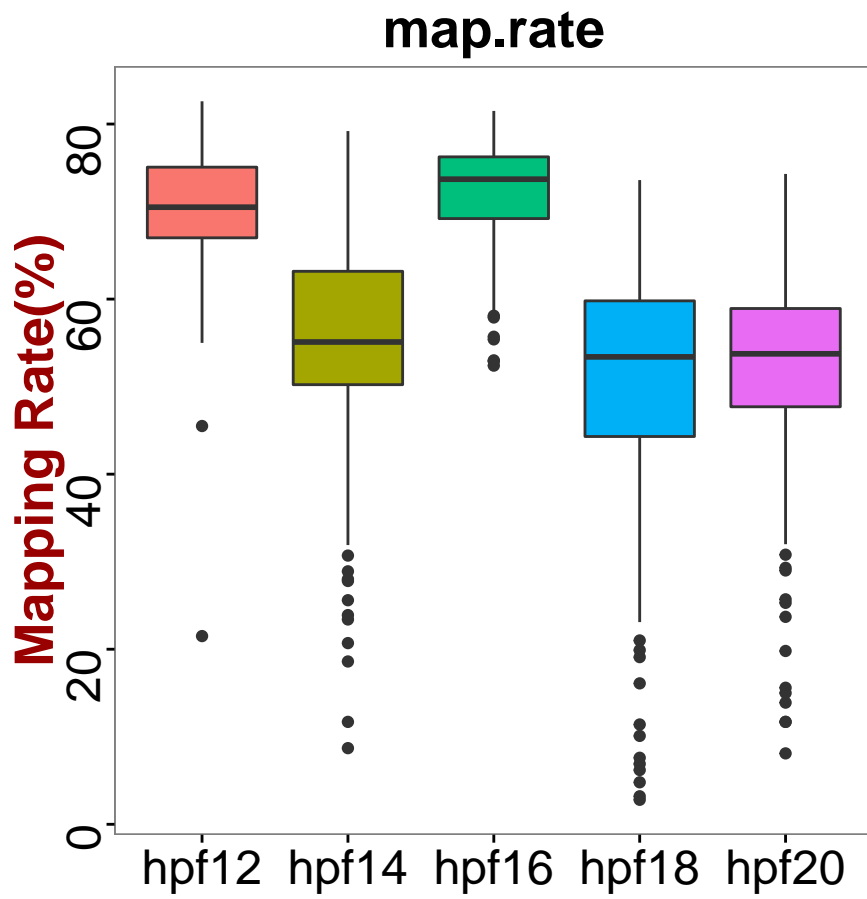

```
boxPlot.FPKM(hpfall, "reads", name.y = "Total Reads", name.x = "", ratio.plot = 1.2e-06,  
name = "Total Reads")
```

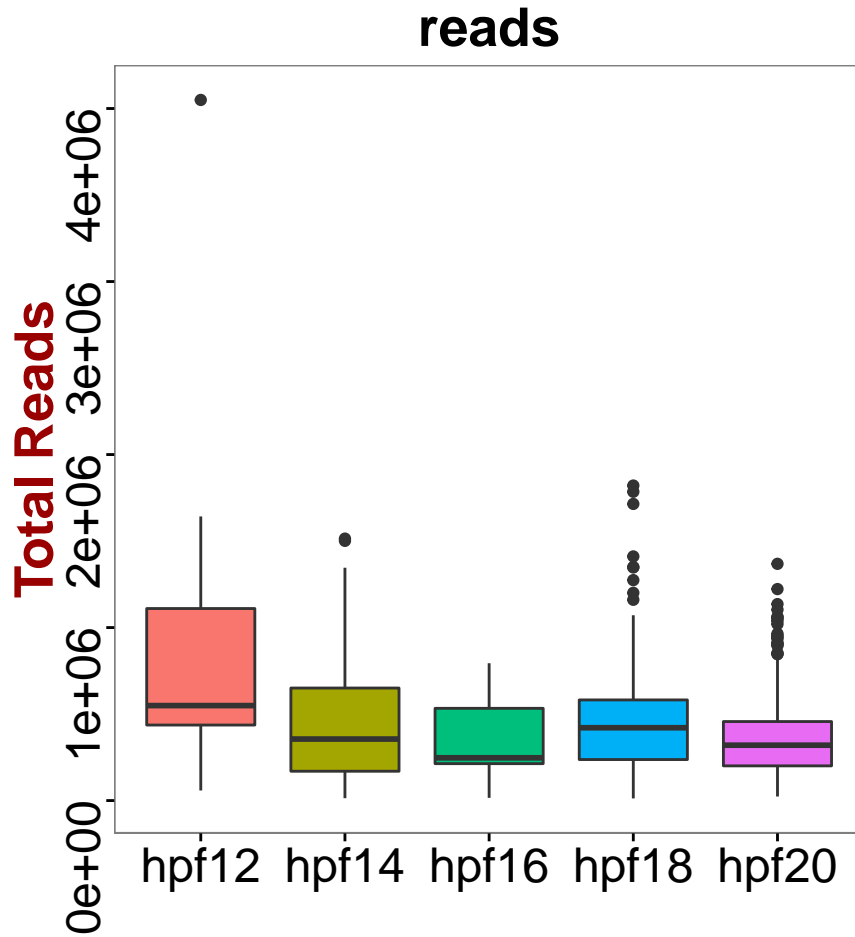

```
hpfall = subsetData(hpfall, subset.name = "map.rate", accept.low = 30)
hpfall = subsetData(hpfall, subset.name = "reads", accept.high = 2e+06)
hpfall
```

```
## An object of class seurat in project allhpf
## 14864 genes across 1138 samples.
```

```
boxPlot.FPKM(hpfall, "map.rate", name.y = "Mapping Rate(%)", ratio.plot = 0.1,
  name.x = "", name = "Mapping Rates")
```



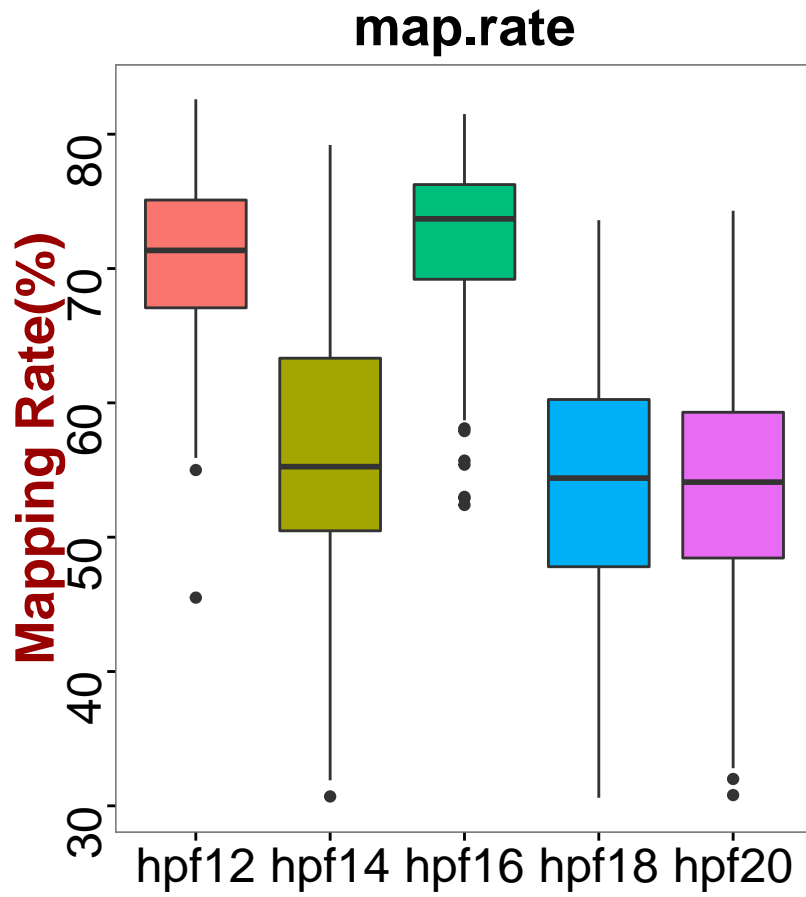

```
boxPlot.FPKM(hpfall, "reads", name.y = "Total Reads", name.x = "", ratio.plot = 3e-06,  
name = "Total Reads")
```

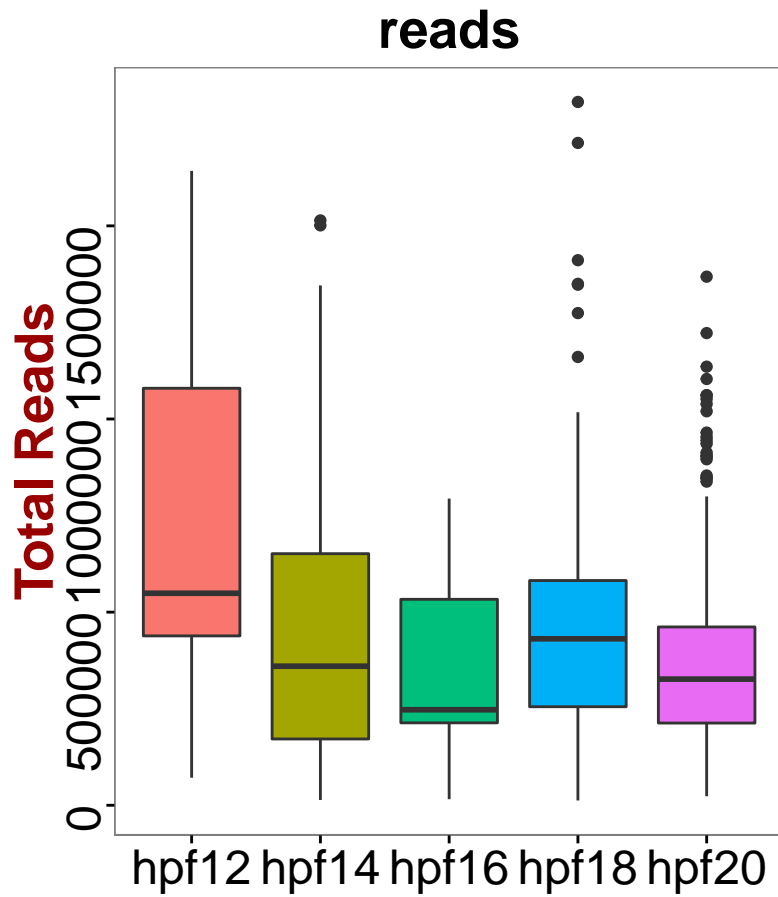

#### 4. Remove Contamination and Batch Effect

```
# PCA on all the genes  
hpfall = pca(hpfall, pc.genes = rownames(hpfall@data), do.print = F)  
pcScree(hpfall, rownames(hpfall@data), 10)  
abline(h = 0.5)
```

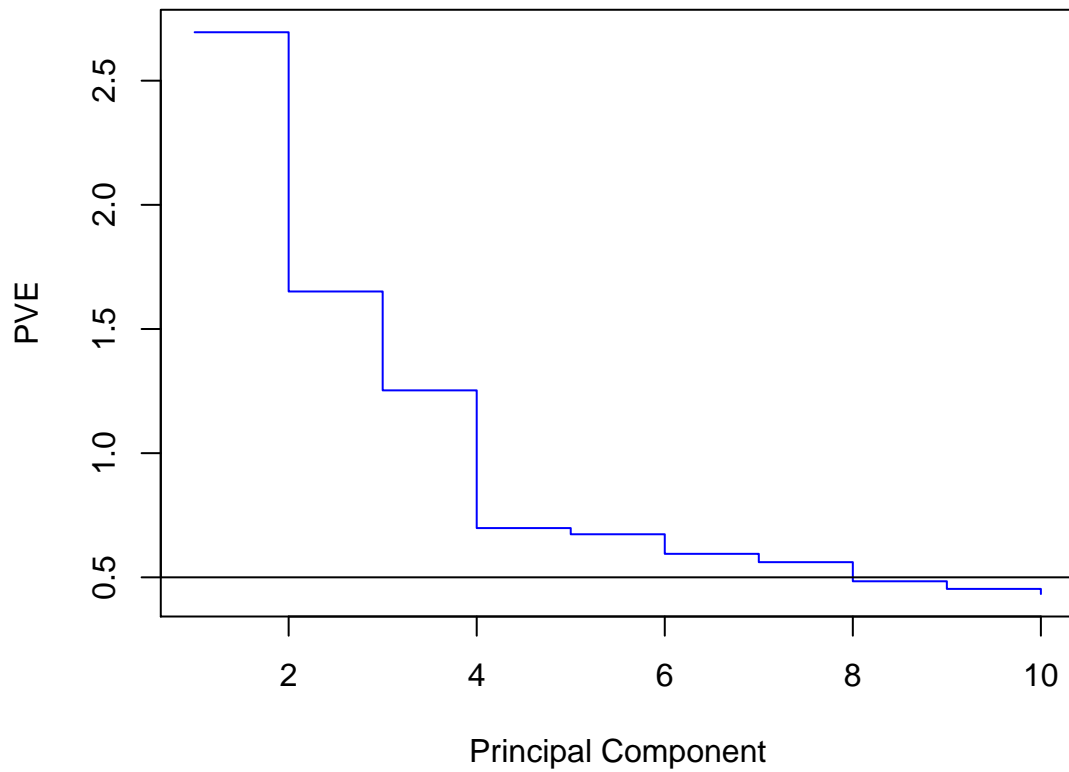

```
# Top 7 PCs are selected (PVE>0.5%)
```

```
# PC1 Population of potential contaminated cell type
```

```
doHeatMap(hpfall, remove.key = T, slim.col.label = T, genes.use = pcTopGenes(hpfall,  
1), cells.use = pcTopCells(hpfall, 1), col.use = col)
```

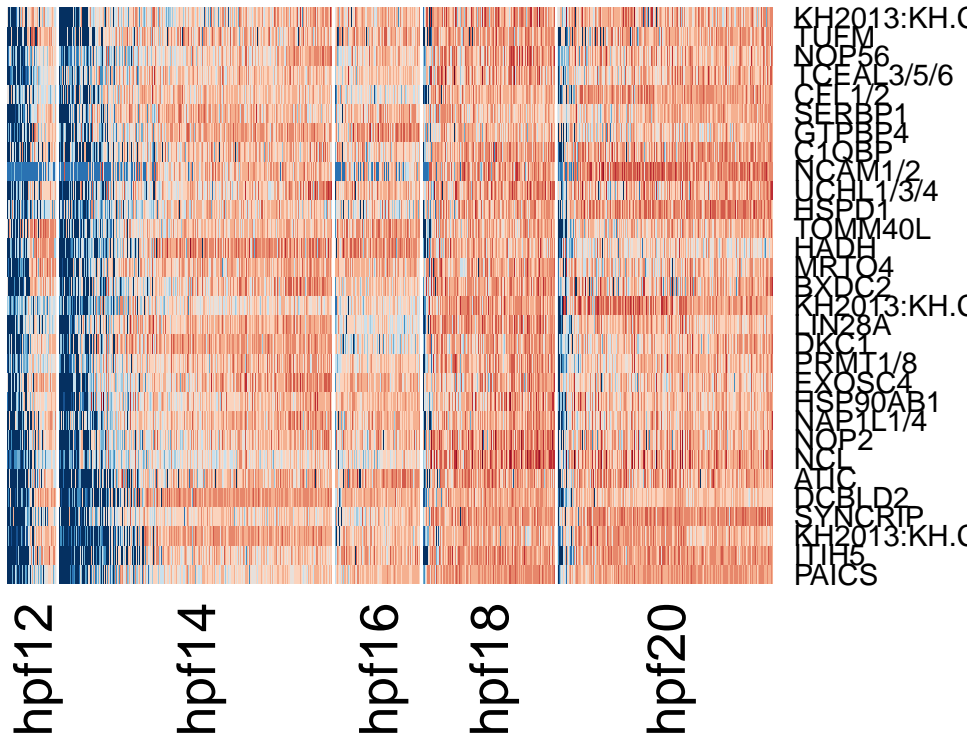

```
pca.plot(hpfall, 1, 2)
```

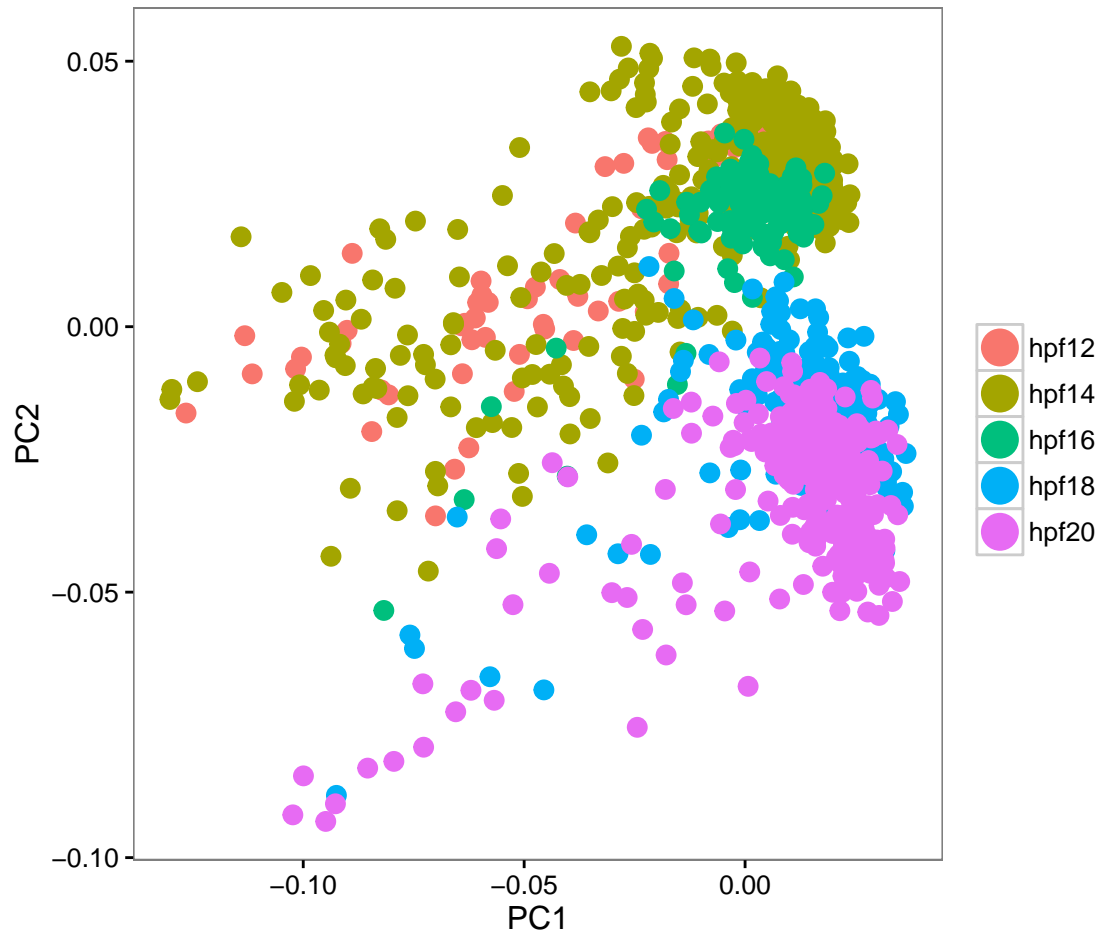

```
# PC2 Batch effect due to library preparation, it separates hpf12/14/16 with
# hpf18/20
doHeatMap(hpfall, remove.key = T, slim.col.label = T, genes.use = pcTopGenes(hpfall,
  2), cells.use = pcTopCells(hpfall, 2), col.use = col)
```

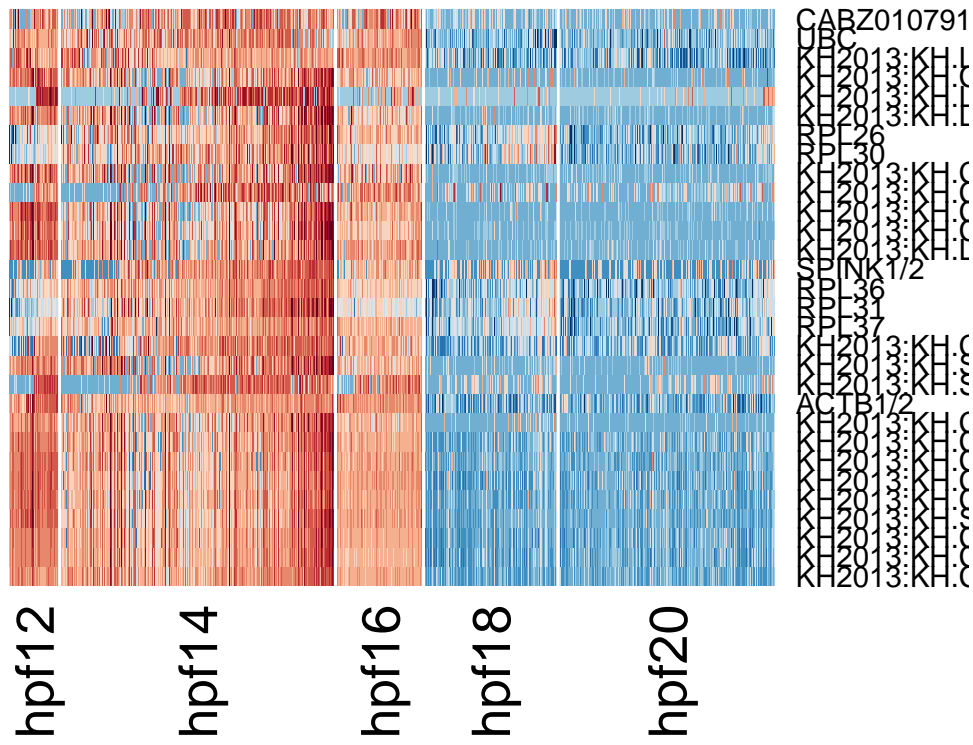

```
pca.plot(hpfall, 1, 2)
```



```
# PC3 Mesenchymal contamination
doHeatMap(hpfall, remove.key = T, slim.col.label = T, genes.use = pcTopGenes(hpfall,
  3), cells.use = pcTopCells(hpfall, 3), col.use = col)
```

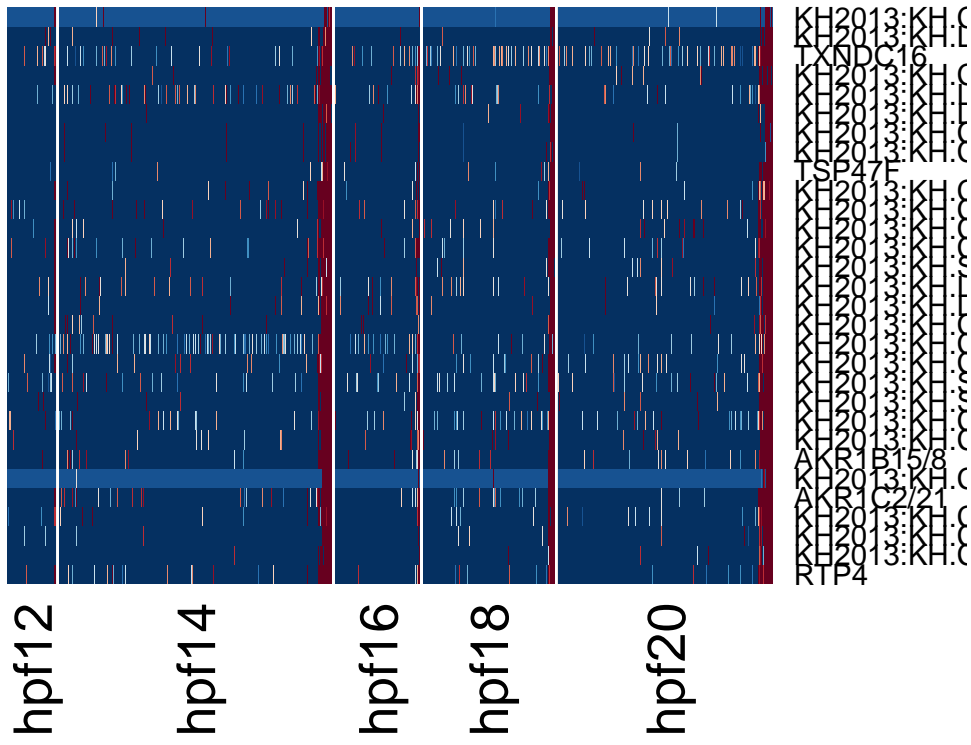

```
pca.plot(hpfall, 1, 3)
```



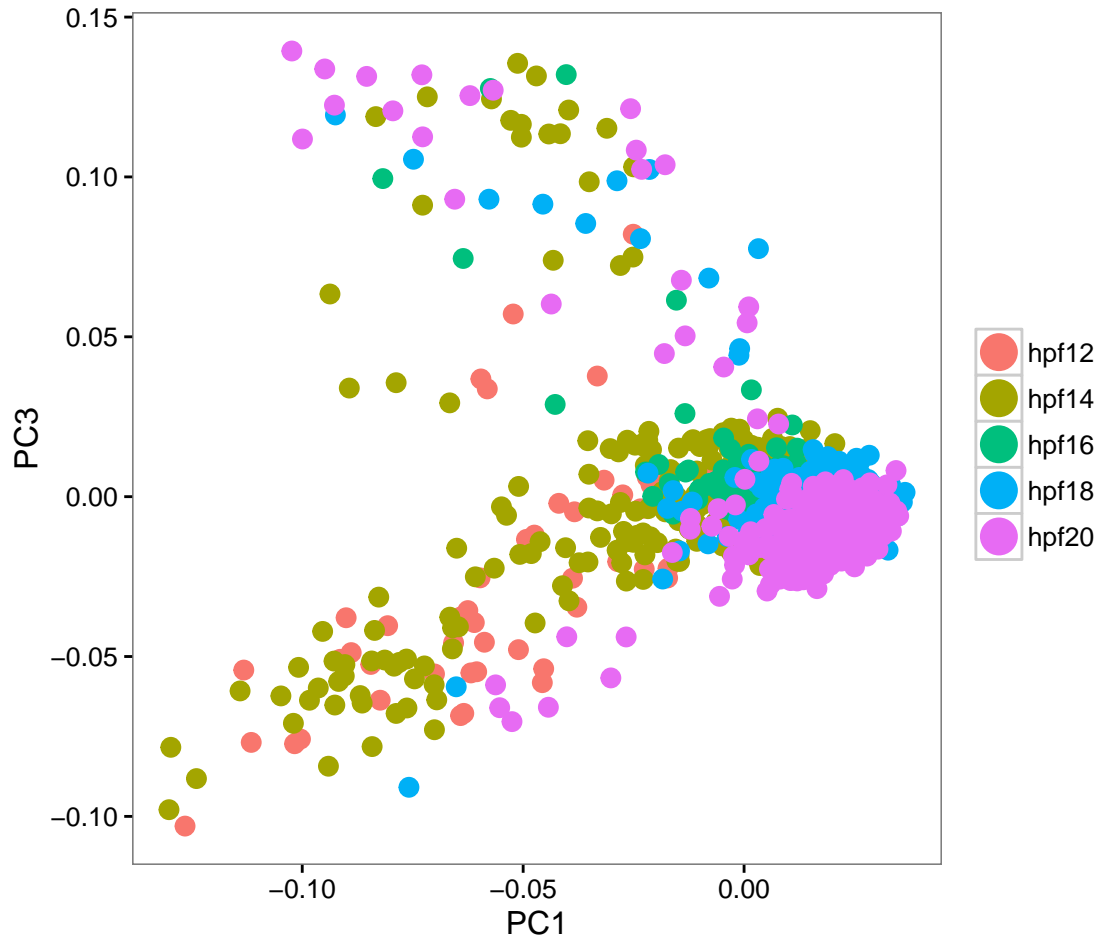

```
feature.plot(hpfall, c("RTP4", "TWIST1"), reduction.use = "pca", dim.2 = 3)
```

**RTP4**

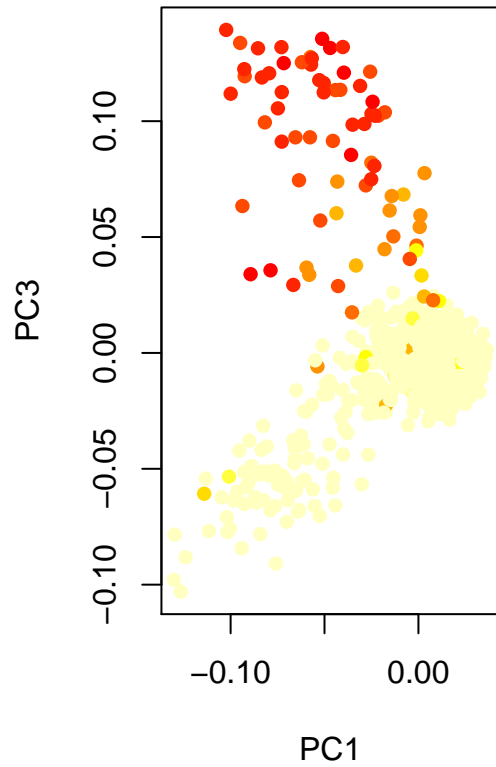

**TWIST1**

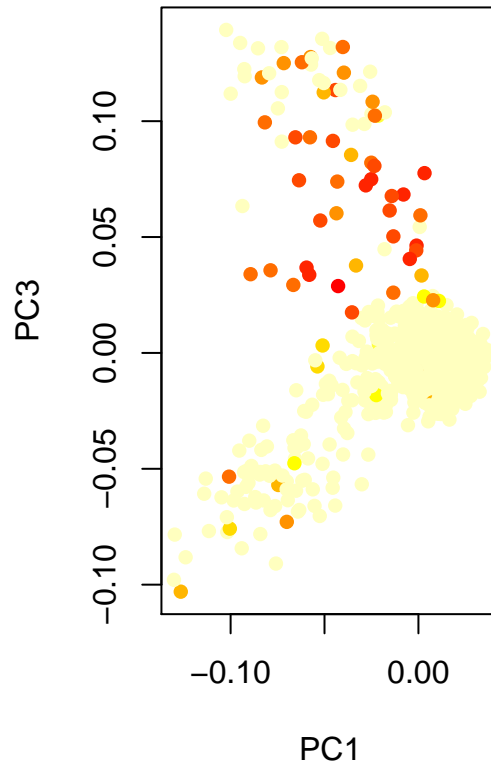

```
# PC4 Heart vs Muscle split  
doHeatMap(hpfall, remove.key = T, slim.col.label = T, genes.use = pcTopGenes(hpfall,  
4), cells.use = pcTopCells(hpfall, 4), col.use = col)
```

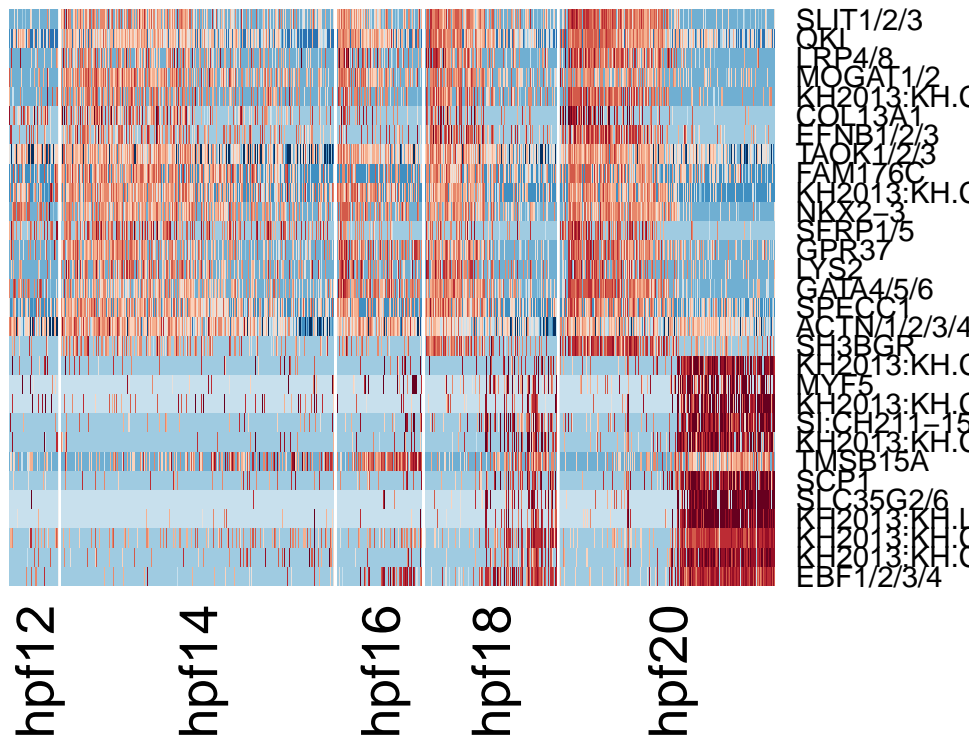

```
feature.plot(hpfall, c("NKX2-3", "EBF1/2/3/4", "TBX1/10", "GATA4/5/6"), reduction.use =
  dim.2 = 4)
```

**NKX2-3**

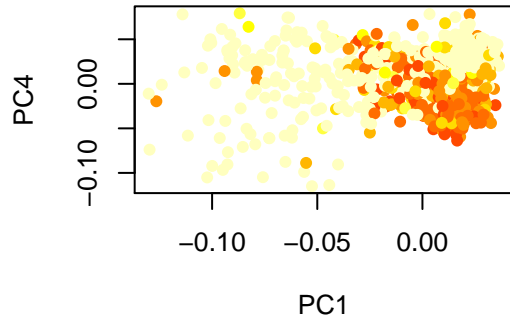

**EBF1/2/3/4**

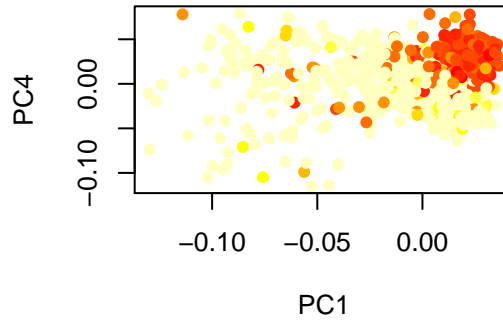

**TBX1/10**

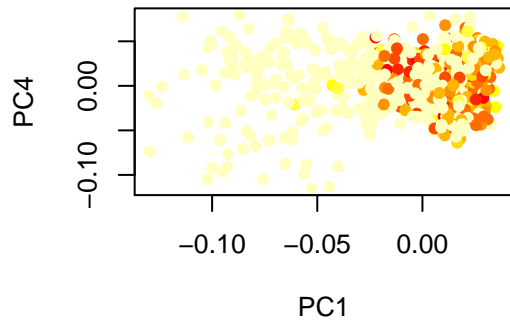

**GATA4/5/6**

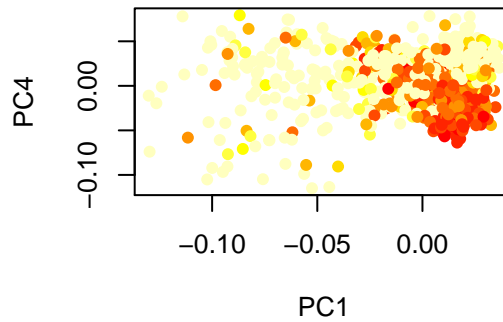

```
# PC5 Another batch effect  
doHeatMap(hpfall, remove.key = T, slim.col.label = T, genes.use = pcTopGenes(hpfall,  
5), cells.use = pcTopCells(hpfall, 5), col.use = col)
```

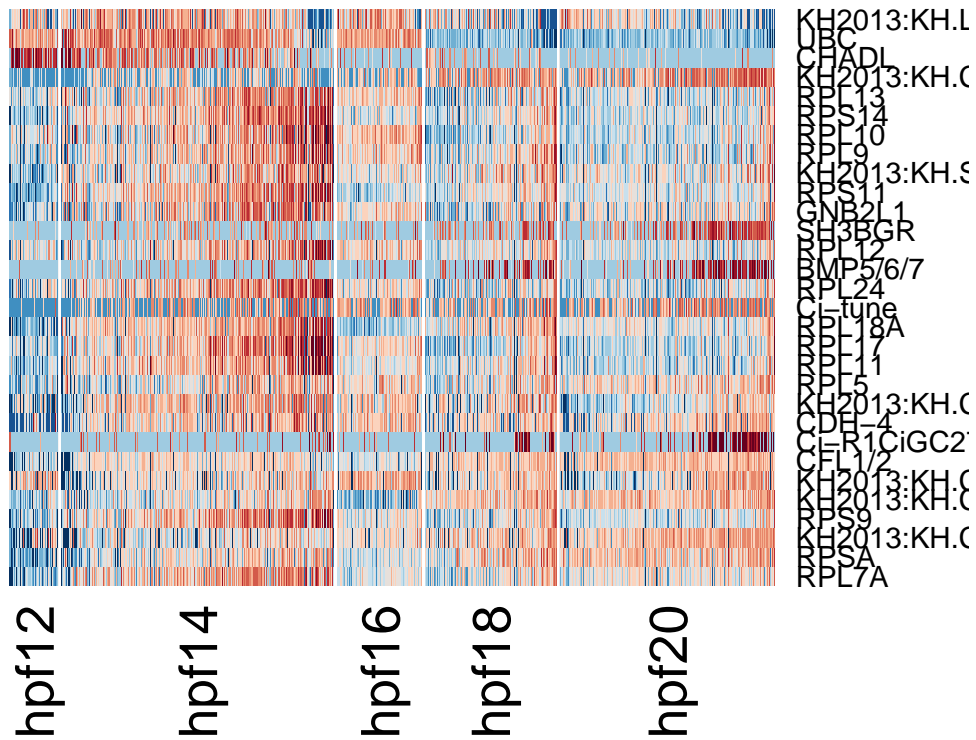

```
pca.plot(hpfall, 1, 5)
```

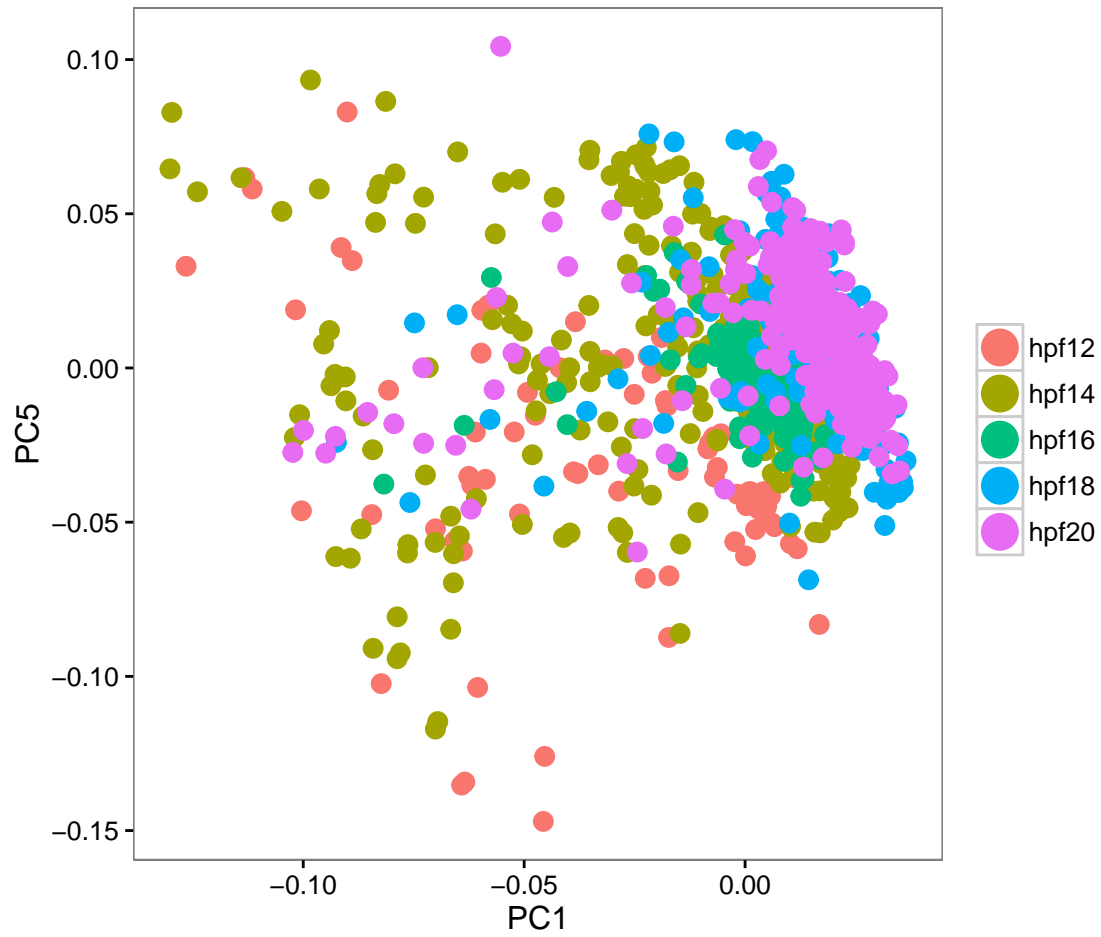

```
# PC6 Saperation by heart vs muscle
doHeatMap(hpfall, remove.key = T, slim.col.label = T, genes.use = pcTopGenes(hpfall,
6), cells.use = pcTopCells(hpfall, 6), col.use = col)
```

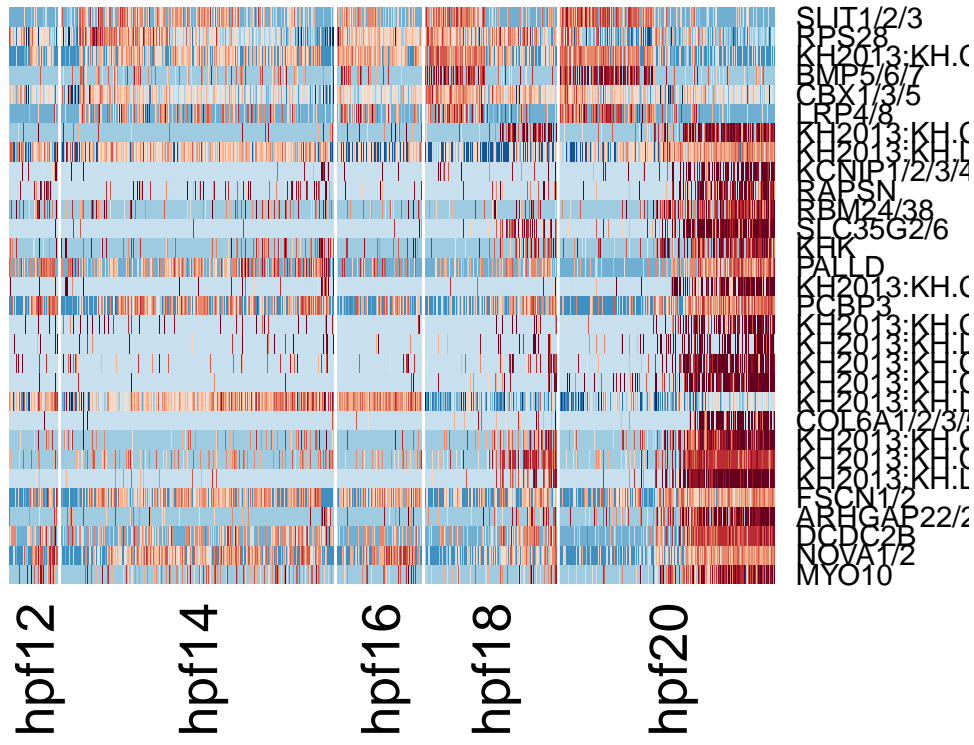

```
pca.plot(hpfall, 1, 6)
```

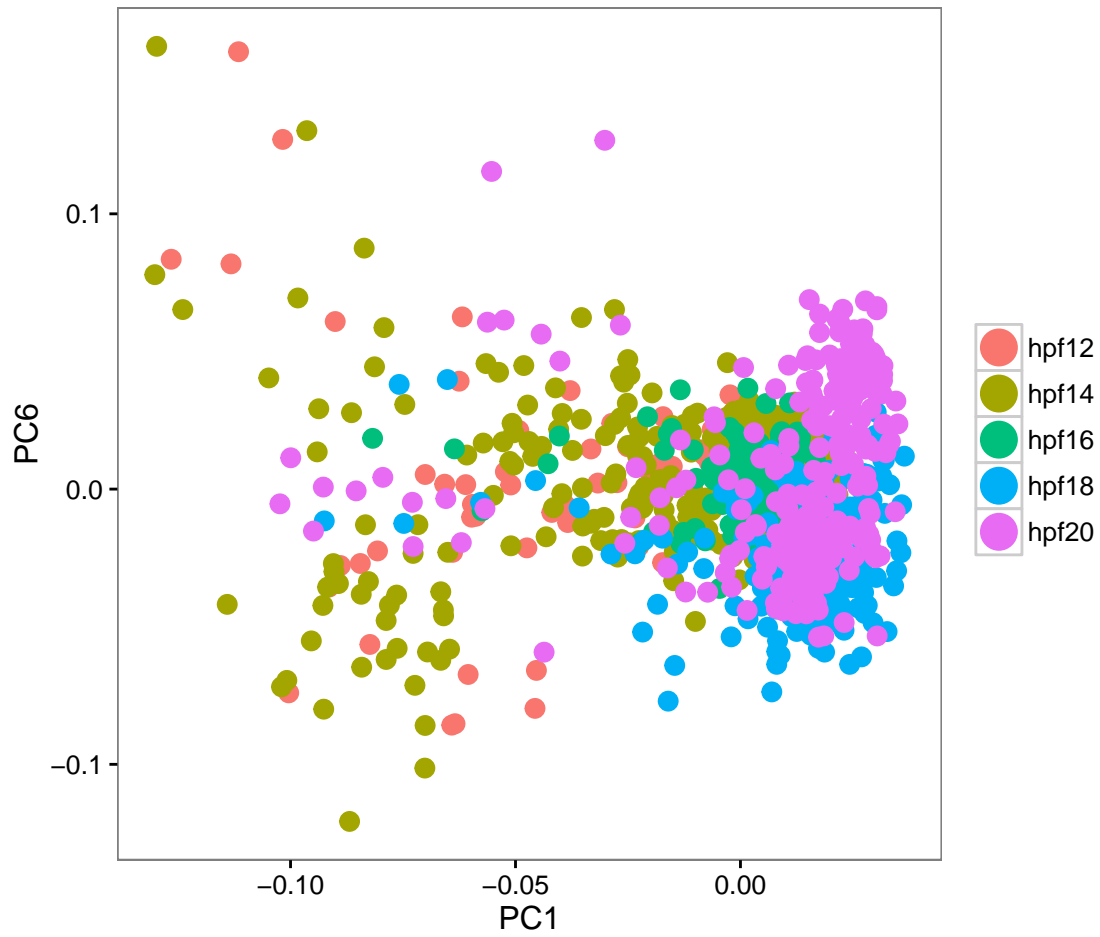

```
feature.plot(hpfall, c("NKX2-3", "EBF1/2/3/4", "TBX1/10", "GATA4/5/6"), reduction.use =  
  dim.2 = 6)
```



**NKX2-3**

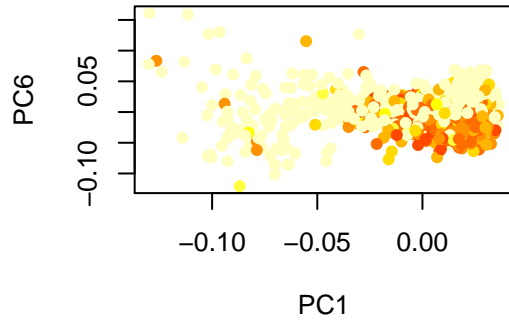

**EBF1/2/3/4**

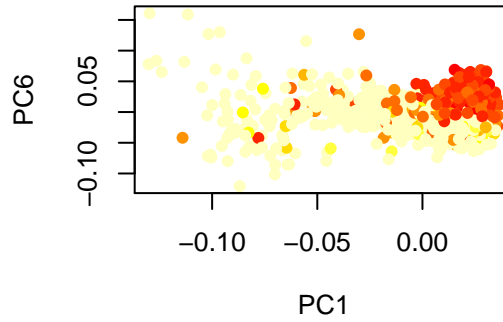

**TBX1/10**

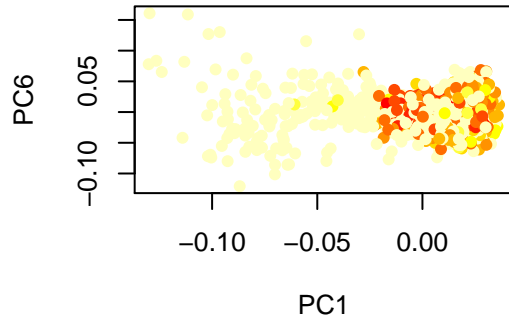

**GATA4/5/6**

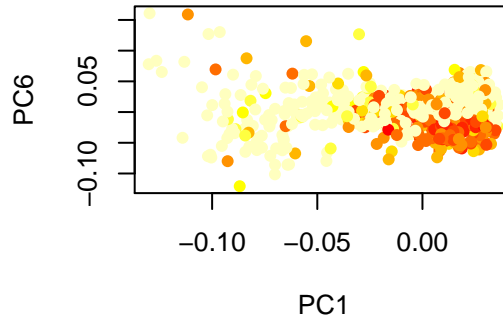

```
# PC7 Batch effect marked hpf14  
doHeatMap(hpfall, remove.key = T, slim.col.label = T, genes.use = pcTopGenes(hpfall,  
7), cells.use = pcTopCells(hpfall, 7), col.use = col)
```

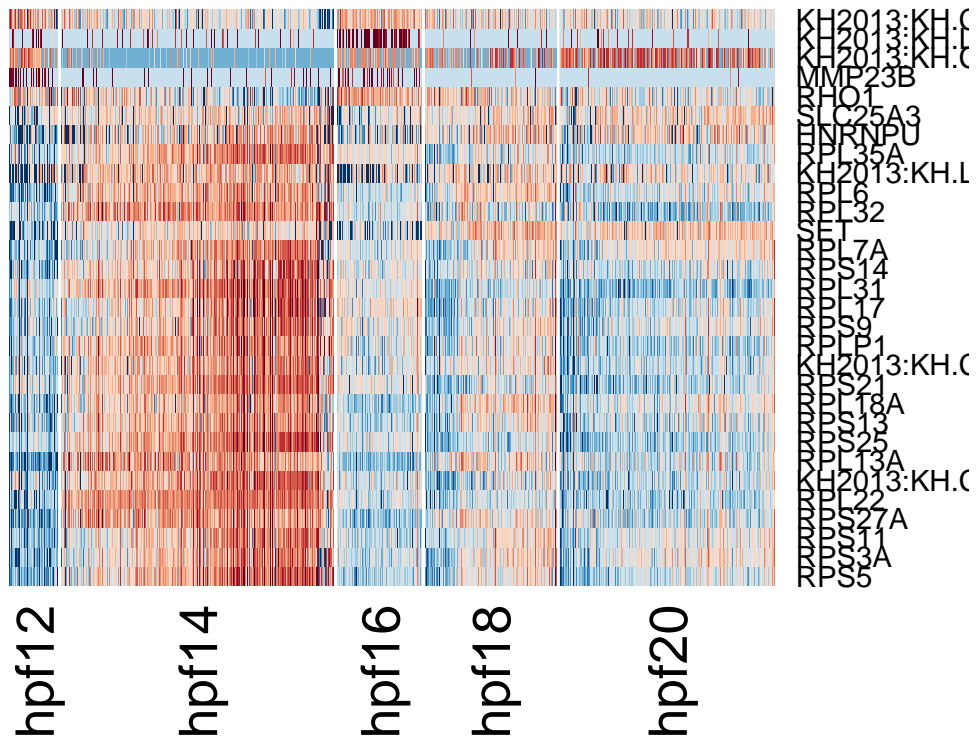

```
pca.plot(hpfall, 1, 7)
```

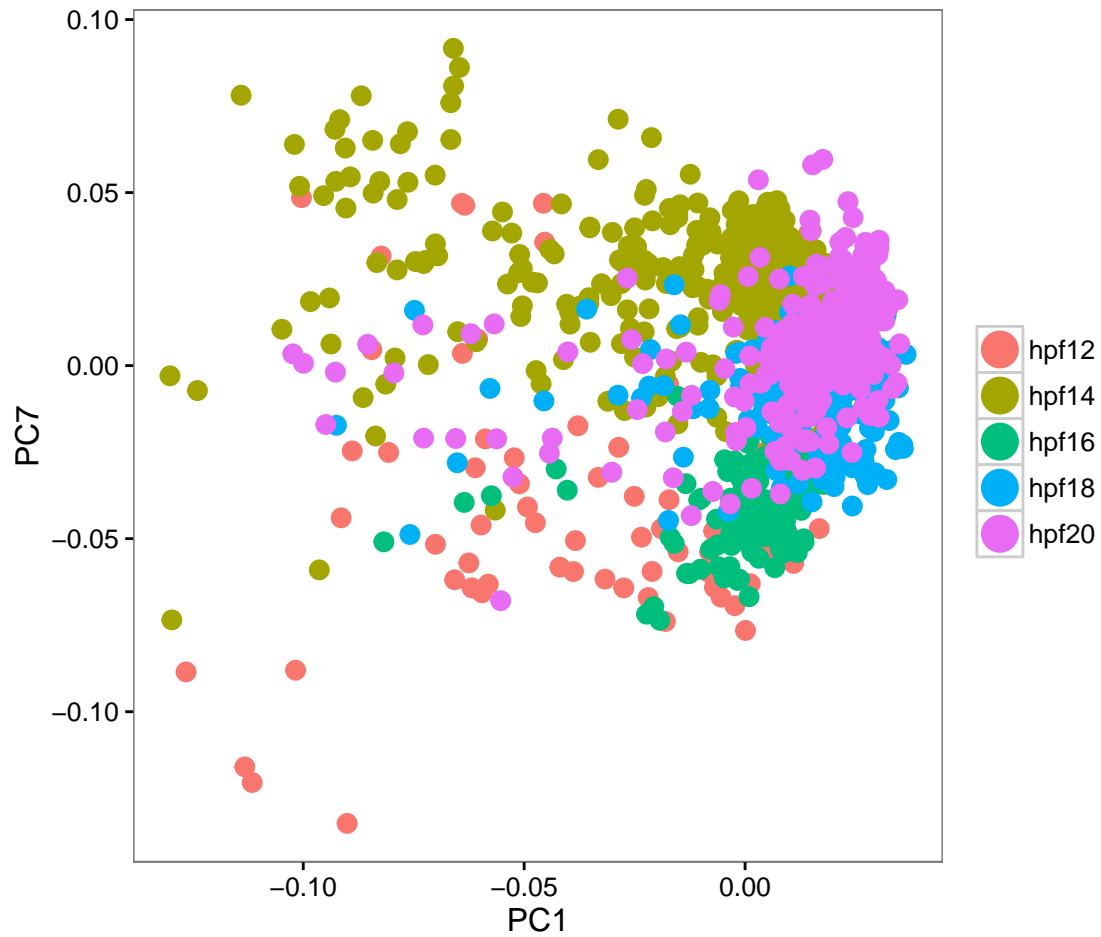

```

# Remove batch effect
hpfall.remv1 = RegressOut(hpfall, c("PC2", "PC5", "PC7"), do.scale = T)

# save object
save(hpfall.remv1, file = "hpfall.remv1.Robj")

# Rerun PCA with all genes
hpfall.remv1 = pca(hpfall.remv1, pc.genes = rownames(hpfall.remv1@data), do.print = F)
pcScree(hpfall.remv1, rownames(hpfall.remv1@data), 10)
abline(h = 0.5)

```

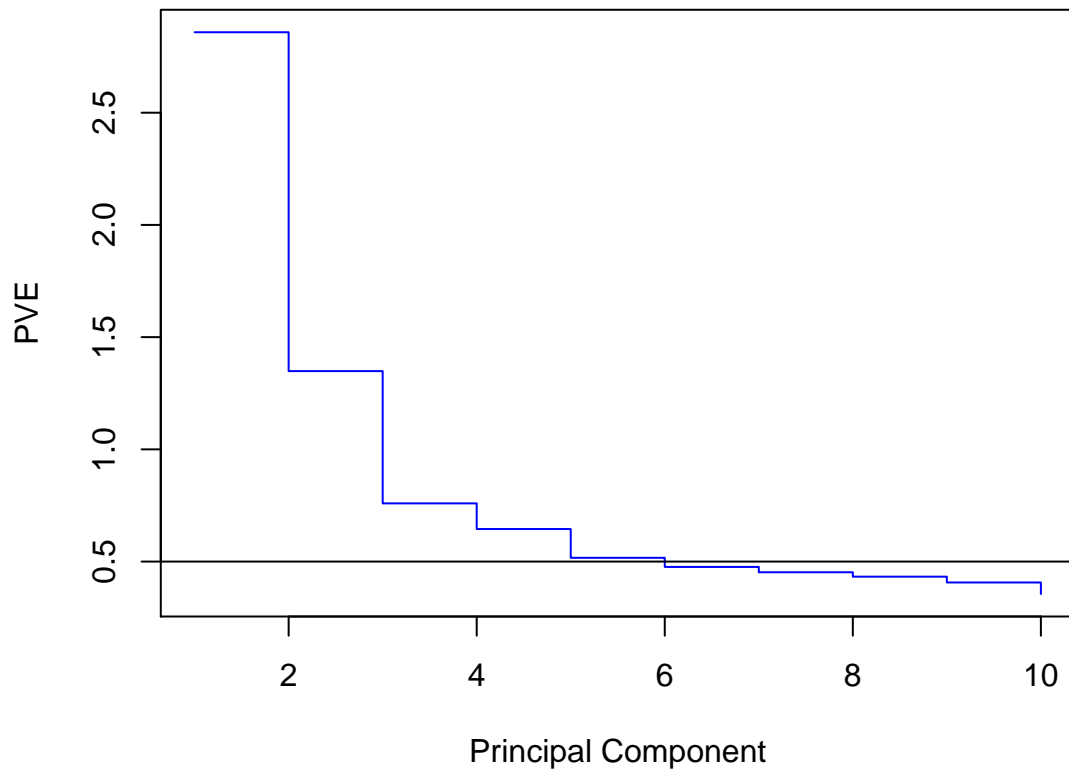

```
# Top 5 PCs are selected (PVE>0.5%)
```

```
# PC1 Population of potential contamination cell type
```

```
doHeatMap(hpfall.remv1, remove.key = T, slim.col.label = T, genes.use = pcTopGenes(hpfall.remv1, 1), cells.use = pcTopCells(hpfall.remv1, 1), col.use = col)
```

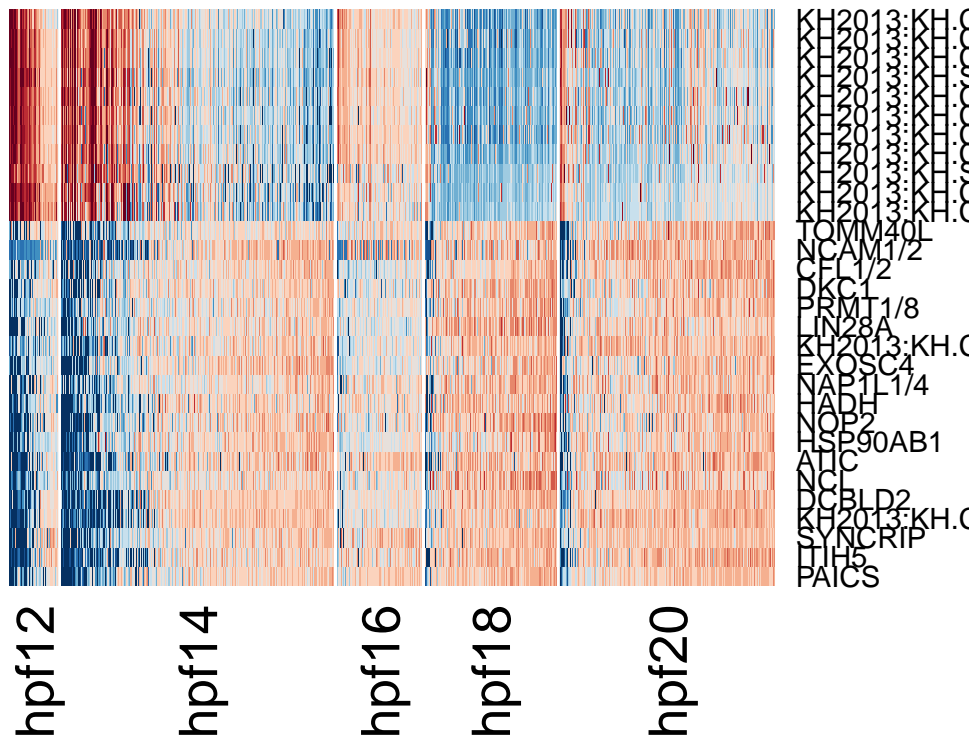

```
pca.plot(hpfall.remv1, 1, 2)
```

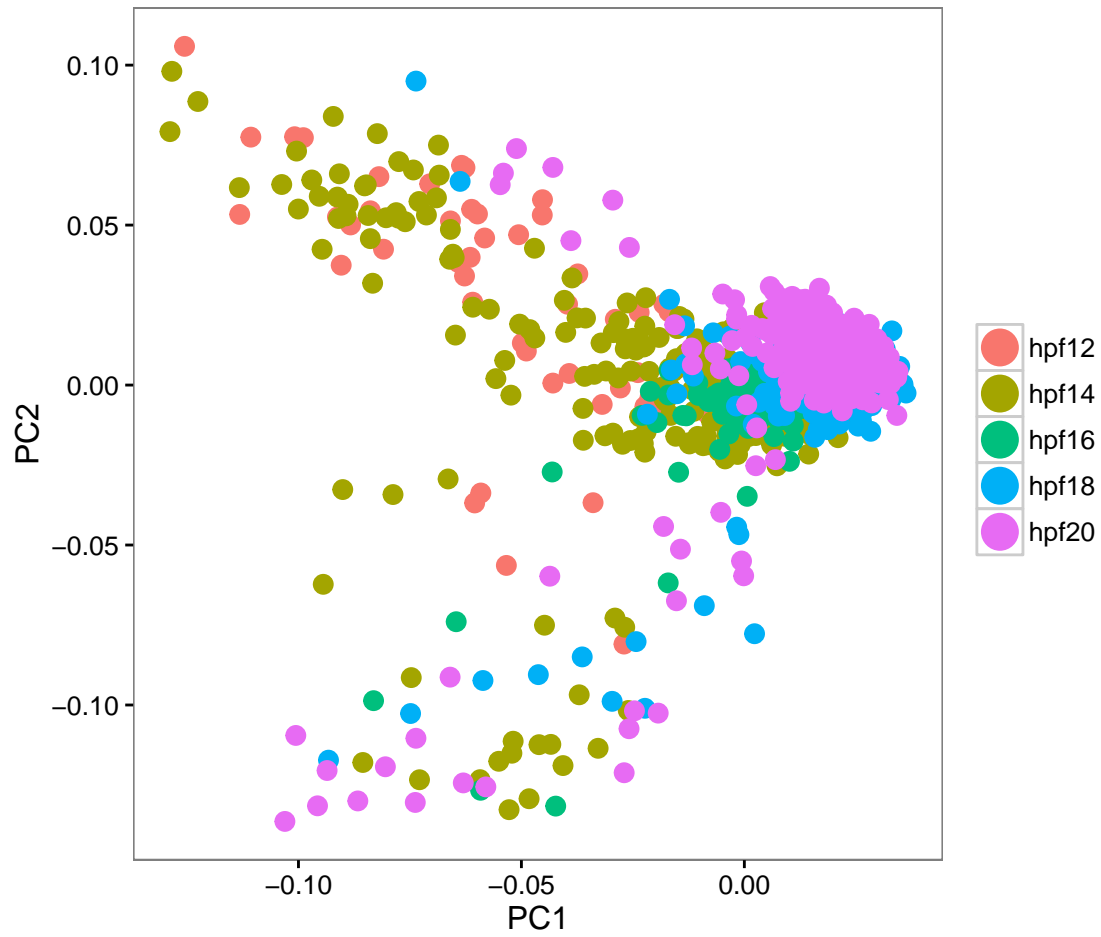

```
# This group of cells also do not express known TVC lineage markers
feature.plot(hpfall.remv1, c("NKX2-3", "GATA4/5/6", "EBF1/2/3/4", "TBX1/10"),
  reduction.use = "pca")
```

**NKX2-3**

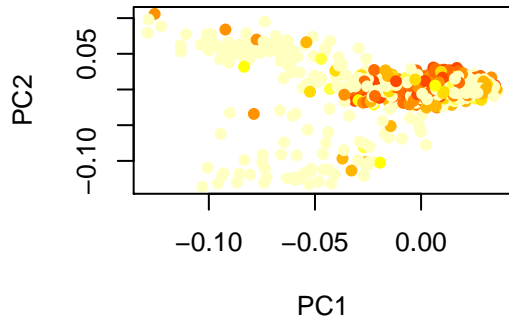

**GATA4/5/6**

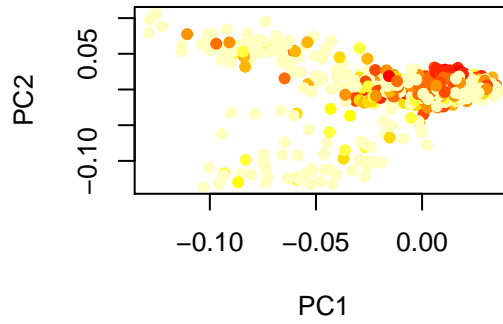

**EBF1/2/3/4**

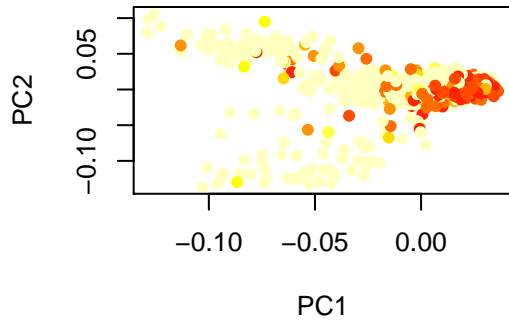

**TBX1/10**

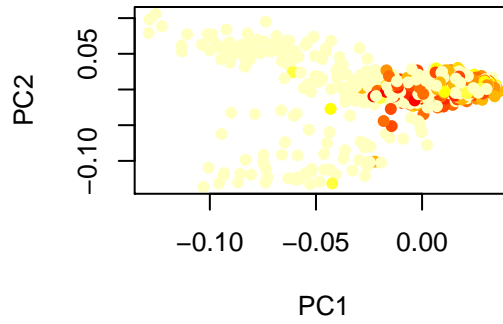

```
# PC2 Mesenchymal Contamination
```

```
doHeatMap(hpfall.remv1, remove.key = T, slim.col.label = T, genes.use = pcTopGenes(hpfall.remv1, 2), cells.use = pcTopCells(hpfall.remv1, 2), col.use = col)
```

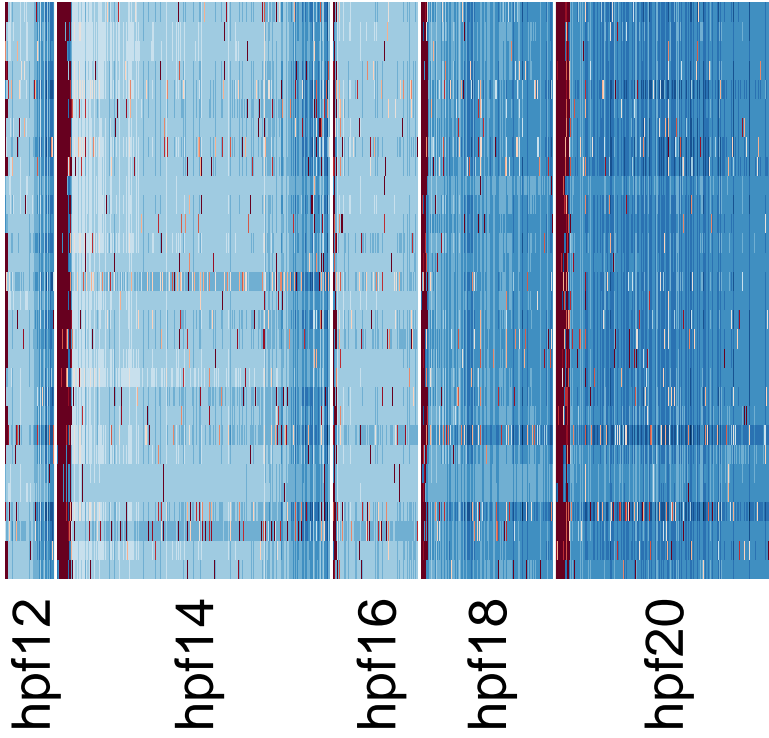

XXXXXTTTXX  
 HHHHHHHHHH  
 XXXXXTTTXX  
 NNNNNNNNNN  
 ZZZZZZZZZZ  
 YYYYYYYYYY  
 QQQQQQQQQQ  
 PPPPPPPPPP  
 RRRRRRRRRR  
 SSSSSSSSSS  
 UUUUUUUUUU  
 VVVVVVVVVV  
 WWWWWWWWWW  
 XXXXXTTTXX  
 HHHHHHHHHH  
 CCCCCCCCCC  
 DDDDDDDDDD  
 EEEEEEEEEE  
 FFFFFFFFFF  
 GGGGGGGGGG  
 HHHHHHHHHH  
 IIIIIIIIII  
 JJJJJJJJJJ  
 KKKKKKKKKK  
 LLLLLLLLLL  
 MMMMMMMMMM  
 NNNNNNNNNN  
 OOOOOOOOOO  
 P  
 Q  
 R  
 S  
 T  
 U  
 V  
 W  
 X  
 Y  
 Z  
 0  
 1  
 2  
 3  
 4  
 5  
 6  
 7  
 8  
 9  
 a  
 b  
 c  
 d  
 e  
 f  
 g  
 h  
 i  
 j  
 k  
 l  
 m  
 n  
 o  
 p  
 q  
 r  
 s  
 t  
 u  
 v  
 w  
 x  
 y  
 z  
 .  
 !  
 @  
 #  
 \$  
 %  
 &  
 \*  
 ( )  
 [ ]  
 { }  
 ^ \_  
 ` ~  
 + =  
 < >

```
pca.plot(hpfall.remv1, 1, 2)
```



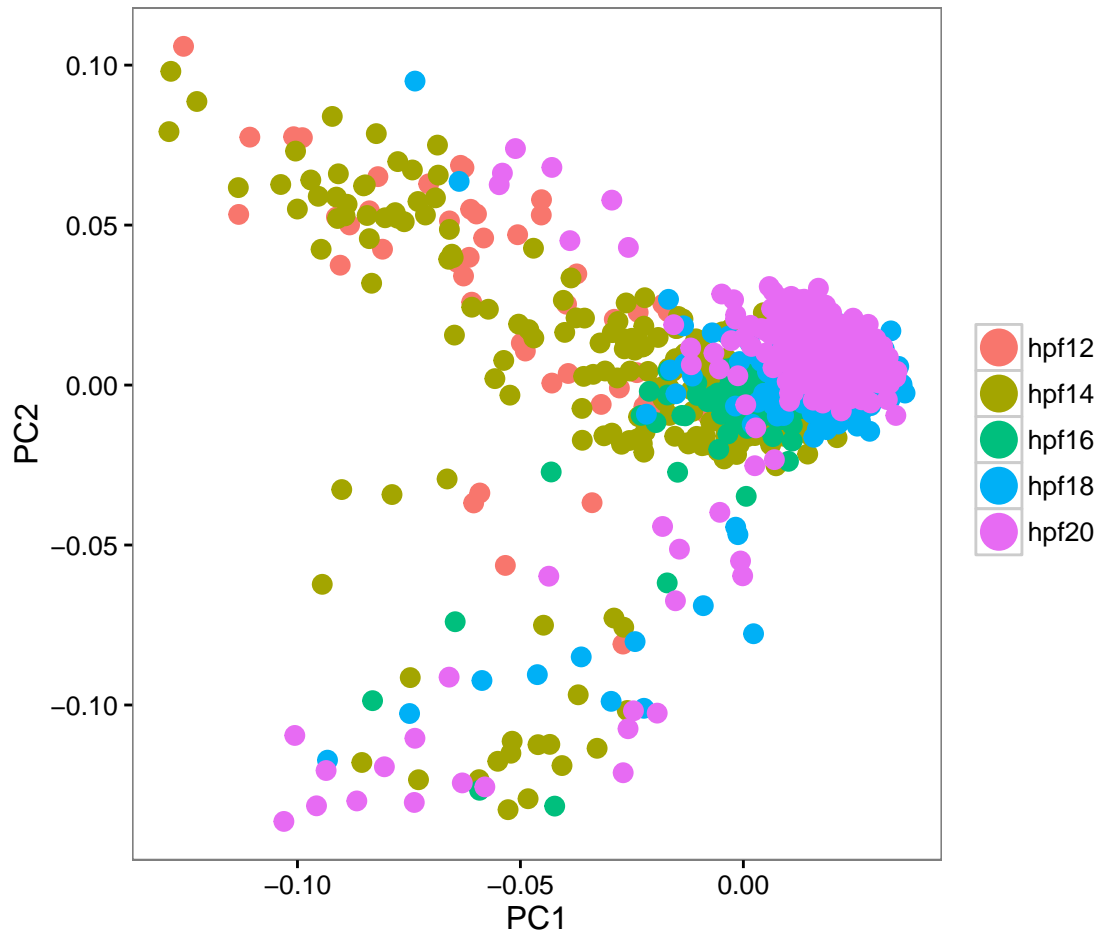

```
feature.plot(hpfall.remv1, c("RTP4", "TWIST1"), reduction.use = "pca")
```

**RTP4**

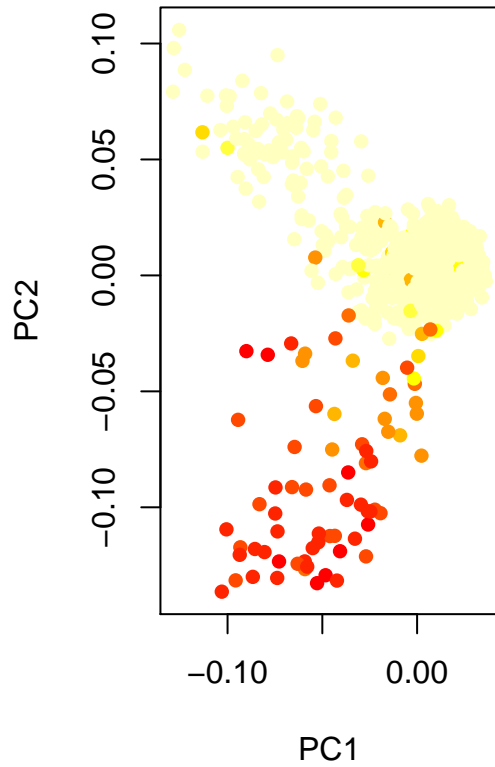

**TWIST1**

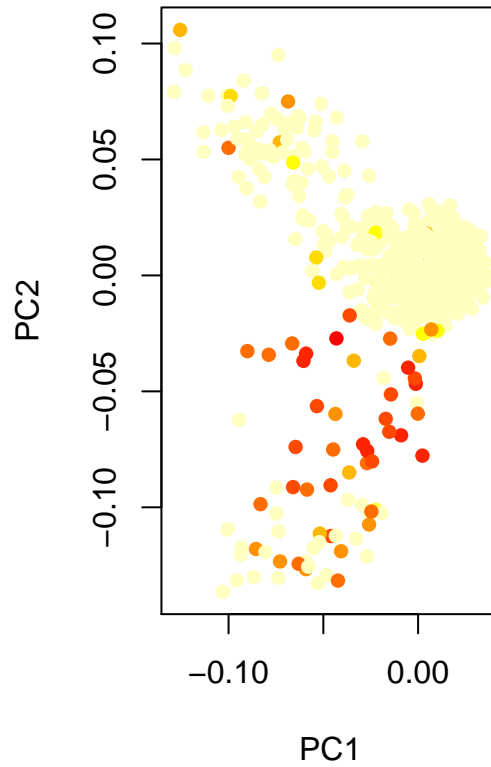

```
# PC3 Heart vs Muscle split  
doHeatMap(hpfall.remv1, remove.key = T, slim.col.label = T, genes.use = pcTopGenes(hpfall.remv1, 3, do.balanced = T), cells.use = pcTopCells(hpfall.remv1, 3), col.use = col)
```



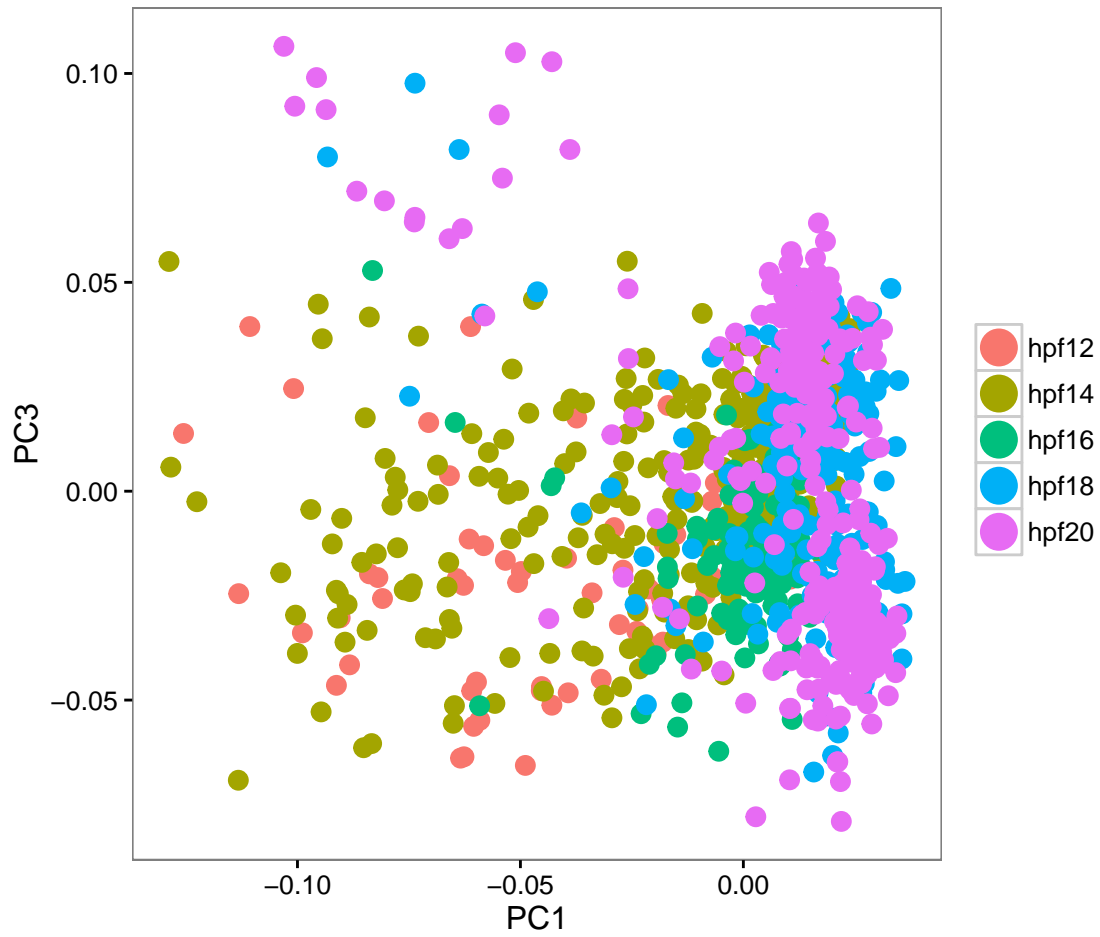

```
feature.plot(hpfall.remv1, c("NKX2-3", "EBF1/2/3/4", "TBX1/10", "GATA4/5/6"),  
reduction.use = "pca", dim.2 = 3)
```

**NKX2-3**

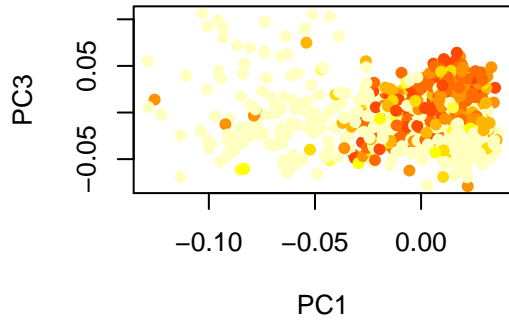

**EBF1/2/3/4**

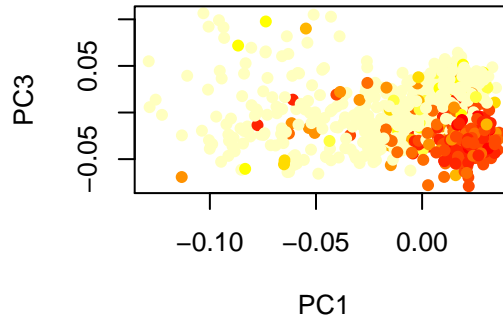

**TBX1/10**

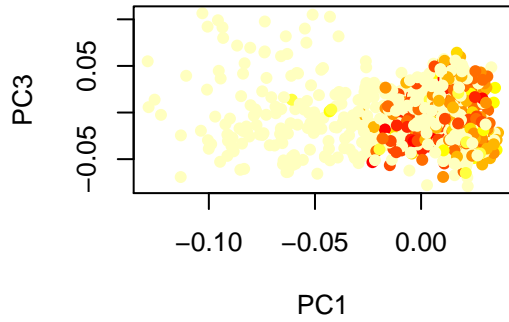

**GATA4/5/6**

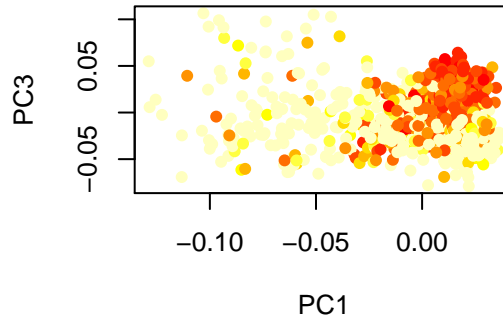

```
# PC4 Saperation by muscle/heart (MYO10, NOVA1/2) and technical noise  
doHeatMap(hpfall.remv1, remove.key = T, slim.col.label = T, genes.use = pcTopGenes(hpfa.  
4), cells.use = pcTopCells(hpfall.remv1, 4), col.use = col)
```

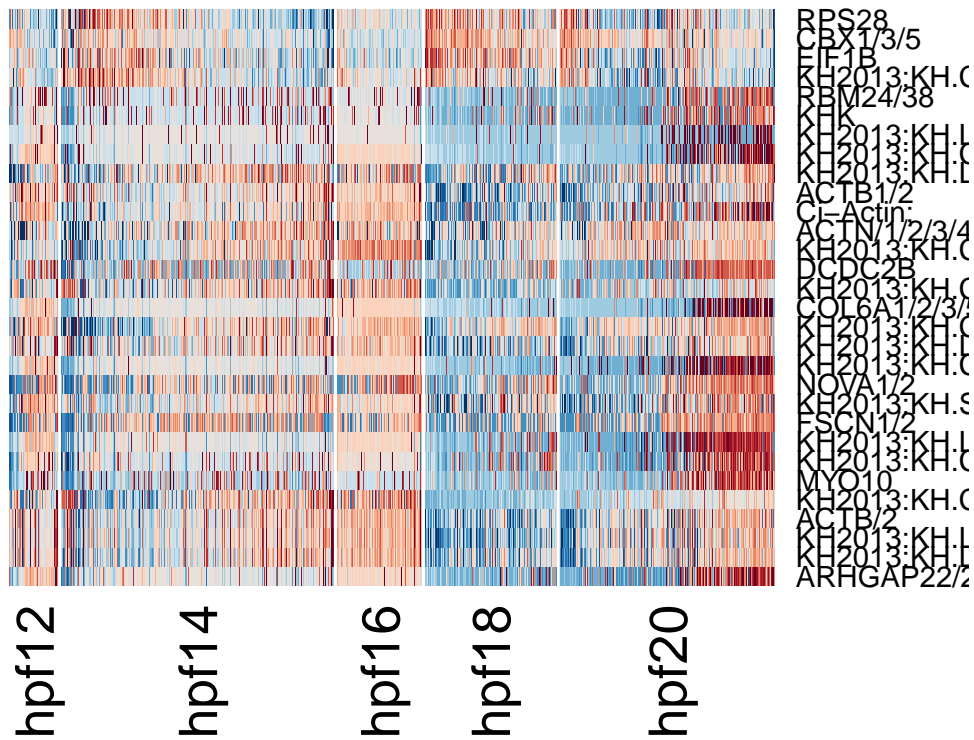

```
pca.plot(hpfall.remv1, 1, 4)
```

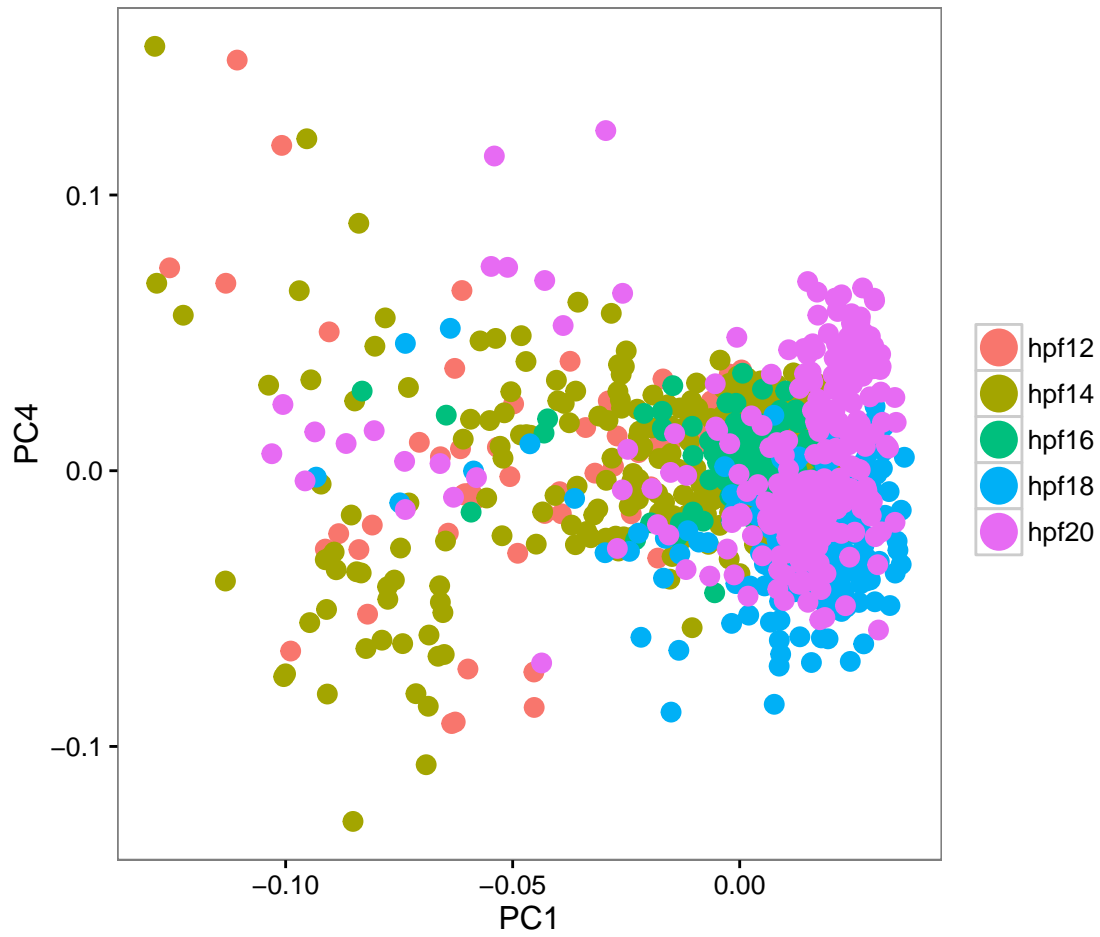

```
feature.plot(hpfall.remv1, c("NKX2-3", "EBF1/2/3/4", "TBX1/10", "GATA4/5/6"),  
reduction.use = "pca", dim.2 = 4)
```

**NKX2-3**

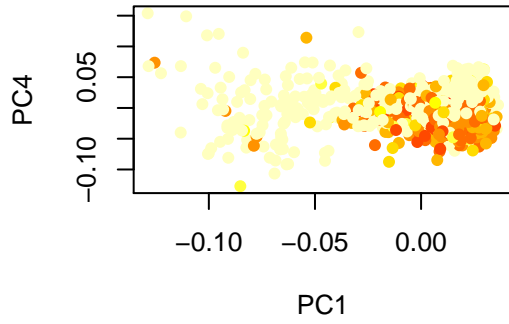

**EBF1/2/3/4**

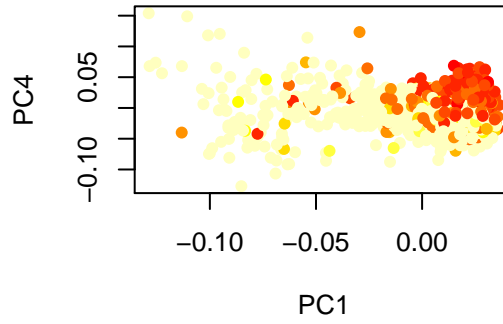

**TBX1/10**

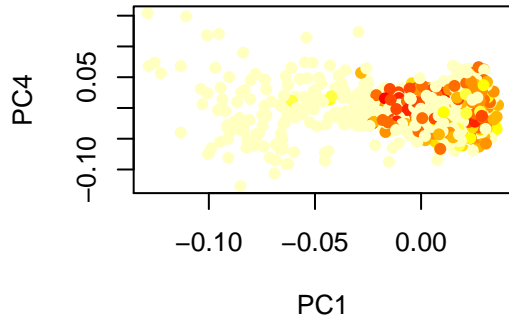

**GATA4/5/6**

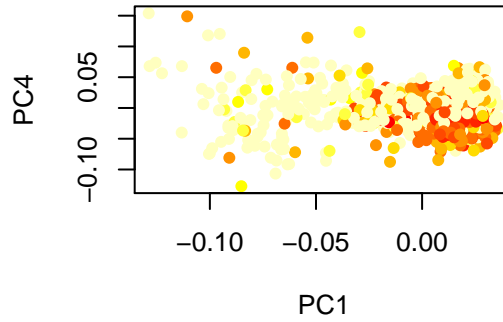

```
# PC5 Saperation by technical noise
```

```
doHeatMap(hpfall.remv1, remove.key = T, slim.col.label = T, genes.use = pcTopGenes(hpfall.remv1, 5), cells.use = pcTopCells(hpfall.remv1, 5), col.use = col)
```



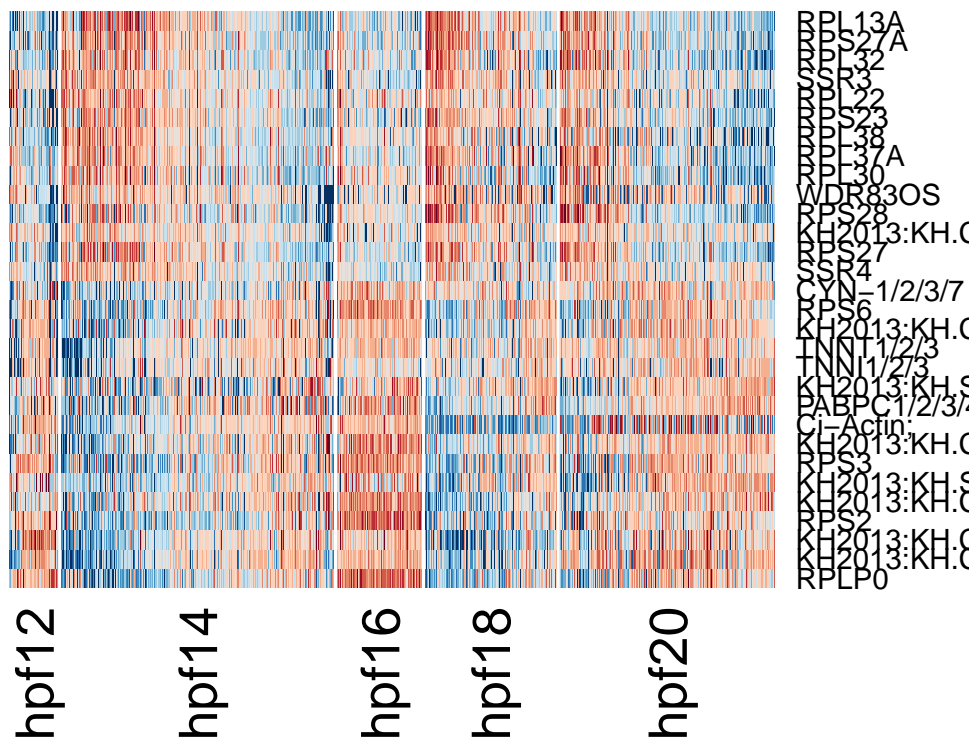

```
pca.plot(hpfall.remv1, 1, 5)
```

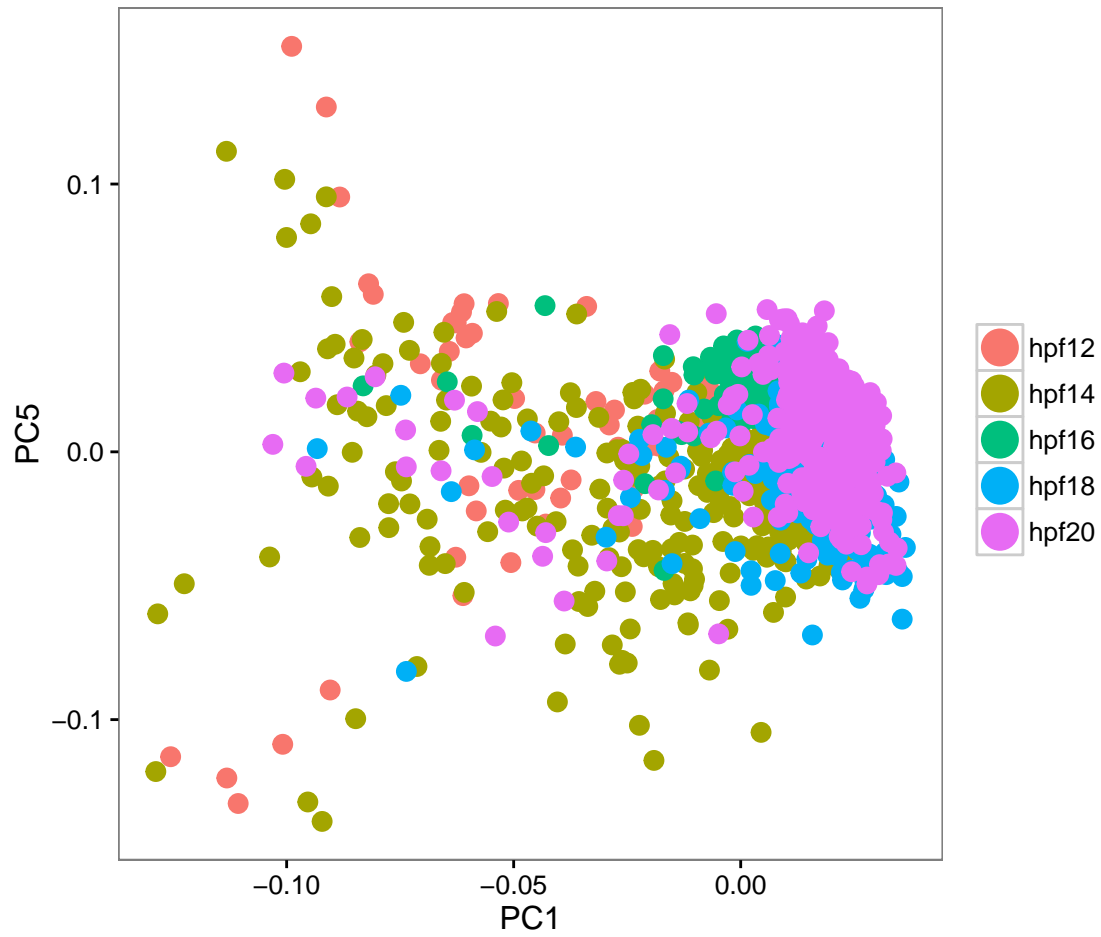

```
feature.plot(hpfall.remv1, c("NKX2-3", "EBF1/2/3/4", "TBX1/10", "GATA4/5/6"),  
reduction.use = "pca", dim.2 = 5)
```

**NKX2-3**

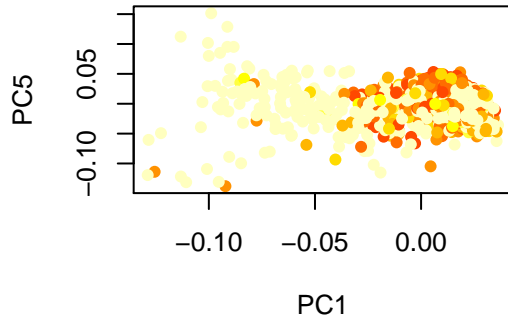

**EBF1/2/3/4**

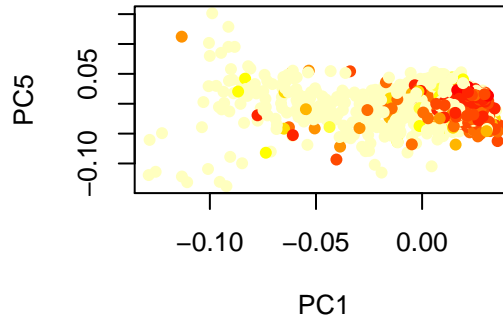

**TBX1/10**

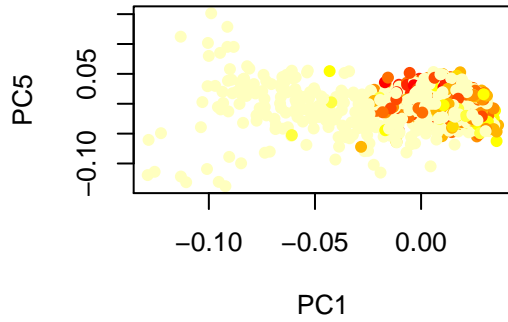

**GATA4/5/6**

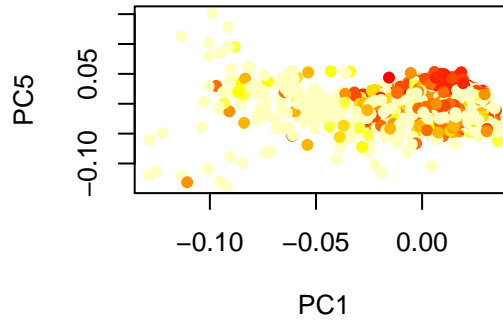

```
# Run tSNE using PC1-3 as input (spectral tSNE), we get distinct point  
# clouds  
hpfall.remv1 = run_tsne(hpfall.remv1, max_iter = 2000, dims.use = 1:3)  
tsne.plot(hpfall.remv1, do.label = T, label.pt.size = 1)
```

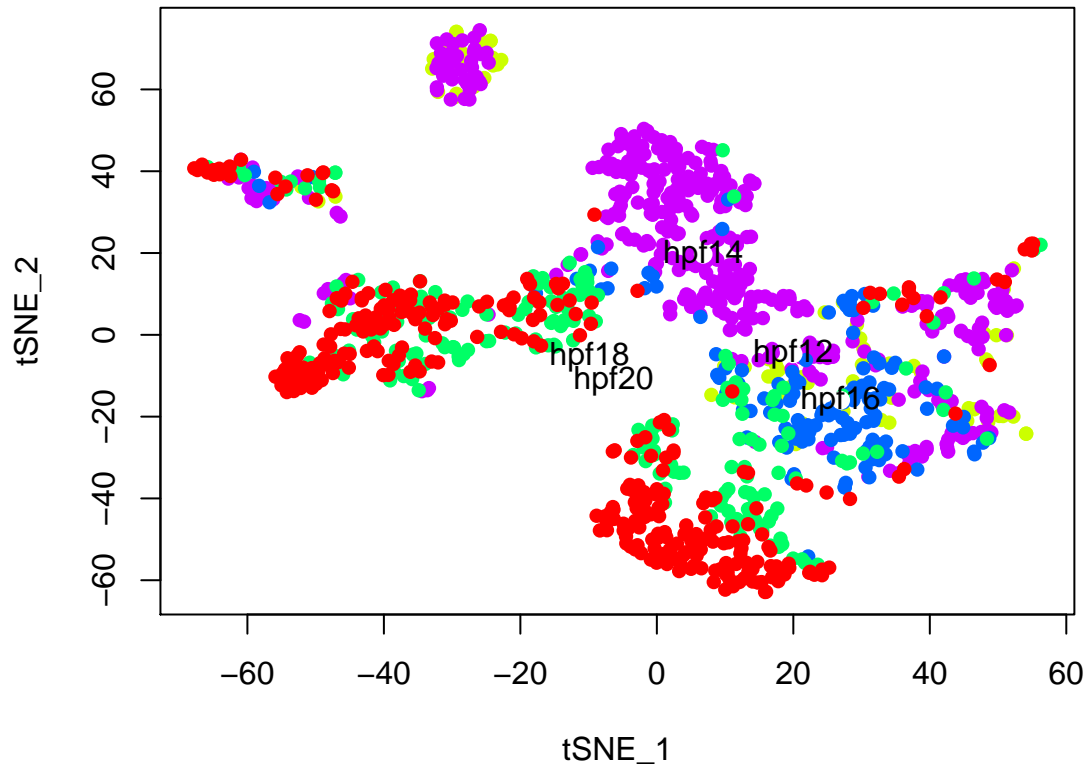

```
# Find cell clusters using Modularity optimization cluster detection.
# k.param = 15 for optimization of detecting small subset of contamination
# cells.
```

```
hpfall.remv1 = FindClusters(hpfall.remv1, pc.use = 1:3, do.modularity = T, resolution =
  prune.SNN = 0.1, print.output = 0, k.param = 15)
```

```
## [1] "SNN : processed 284 cells"
## [1] "SNN : processed 569 cells"
## [1] "SNN : processed 854 cells"
## [1] "SNN : processed 1138 cells"
```

```
tsne.plot(hpfall.remv1, do.label = T, label.pt.size = 1)
```



```
# The mesenchymal contamination cells are located in cluster 12
doHeatMap(hpfall.remv1, remove.key = T, slim.col.label = T, genes.use = pcTopGenes(hpfall.remv1, 2), cells.use = pcTopCells(hpfall.remv1, 2), col.use = col)
```

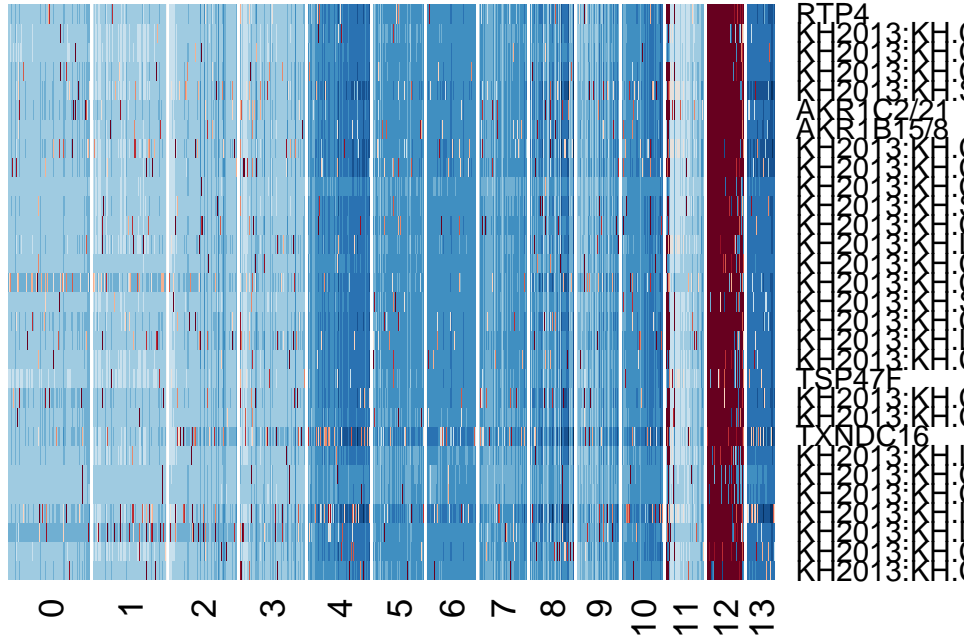

```
# Find markers for these cells Find cluster markers using ROC test with
# thresh.use = 1, min.pct = 0.5 The ROC test returns the 'classification
# power' for any individual marker (ranging from 0 - random, to 1 -
# perfect). Though not a statistical test, it is often very useful for
# finding clean markers.
```

```
# Find markers for mesenchymal cells
mesen.marker = find.markers(hpfall.remv1, 12, thresh.use = 1, test.use = "roc",
  min.pct = 0.5)
head(mesen.marker[order(mesen.marker$myAUC, decreasing = T), ], 20)
```

| ##                           | myAUC | avg_diff | power | pct.1 | pct.2 |
|------------------------------|-------|----------|-------|-------|-------|
| ## AKR1B15/8                 | 0.998 | 5.261399 | 0.996 | 1.000 | 0.044 |
| ## KH2013:KH.L122.14_JMJD5   | 0.997 | 4.569135 | 0.994 | 1.000 | 0.241 |
| ## EGLN3                     | 0.997 | 4.312634 | 0.994 | 1.000 | 0.305 |
| ## KH2013:KH.C1.439_CG14331  | 0.996 | 3.798124 | 0.992 | 1.000 | 0.582 |
| ## KH2013:KH.C14.521_JMJD5/7 | 0.996 | 5.603266 | 0.992 | 1.000 | 0.065 |
| ## RTP4                      | 0.996 | 4.621945 | 0.992 | 1.000 | 0.038 |
| ## KH2013:KH.C1.561_TUB1/3   | 0.994 | 4.178222 | 0.988 | 1.000 | 0.048 |
| ## KH2013:KH.L18.67          | 0.994 | 4.708396 | 0.988 | 1.000 | 0.238 |
| ## KH2013:KH.C4.120          | 0.993 | 3.867655 | 0.986 | 1.000 | 0.501 |
| ## KH2013:KH.C6.268_JMJD7    | 0.991 | 4.448726 | 0.982 | 1.000 | 0.205 |

```

## AKR1C2/21          0.989 5.118831 0.978 0.983 0.056
## TXNDC16           0.988 5.751290 0.976 0.983 0.133
## KH2013:KH.C5.228_JMJD5 0.988 5.183405 0.976 0.983 0.035
## KH2013:KH.L154.6_JMJD5 0.985 3.895723 0.970 0.983 0.305
## KH2013:KH.C4.618   0.982 4.715708 0.964 0.949 0.101
## KH2013:KH.S936.1_JMJD5 0.981 5.585791 0.962 0.966 0.076
## KH2013:KH.C9.326_JMJD5 0.980 5.946468 0.960 0.966 0.066
## KH2013:KH.S936.3_JMJD5 0.980 4.861421 0.960 0.966 0.126
## KH2013:KH.C3.921_JMJD5/7 0.979 5.033655 0.958 0.966 0.042
## KH2013:KH.C1.30_CG14331 0.977 3.816522 0.954 0.983 0.359

```

```

write.table(which.cells(hpfall.remv1, 12), "mesen.cellname.txt")
write.table(mesen.marker, "mesenchymal.marker.txt", row.names = T, col.names = NA,
  sep = "\t")

```

```

# Find markers for the other group of cells by comparing to mesenchymal
contam.marker = find.markers(hpfall.remv1, c(8, 9, 11), 12, thresh.use = 1,
  test.use = "roc", min.pct = 0.5)
head(contam.marker[order(contam.marker$myAUC, decreasing = T), ], 20)

```

```

##                               myAUC avg_diff power pct.1
## SDC/1/2/4                     0.897 2.491357 0.794 0.924
## CTNNB1                        0.890 2.178370 0.780 0.960
## FARP1/2                       0.861 2.957062 0.722 0.763
## KH2013:KH.C6.26_GJA4          0.835 1.883192 0.670 0.949
## CD151                          0.825 2.937783 0.650 0.722
## KH2013:KH.C11.378_CLDN1/10/14/19/2/3/4/5/6/7/9 0.822 2.707400 0.644 0.838
## FOXH1                         0.821 2.963121 0.642 0.727
## KH2013:KH.C7.805_ID1/2/3/4    0.803 2.472959 0.606 0.833
## KH2013:KH.L154.1_LRP5/6      0.796 2.110253 0.592 0.631
## MAP1LC3C                     0.792 2.678988 0.584 0.657
## LAMB1/2/3/4                  0.792 1.649389 0.584 0.828
## Ci-Coll12A1                  0.791 2.145317 0.582 0.823
## KH2013:KH.L20.63             0.791 1.213074 0.582 0.995
## KH2013:KH.C1.738_CG9550      0.790 2.475260 0.580 0.717
## TIE1/2                       0.789 1.132390 0.578 0.995
## CDH1/13/15/2/3/4            0.786 2.108102 0.572 0.707
## ARVCF                        0.785 2.861593 0.570 0.631
## CFL1/2                       0.784 1.644946 0.568 0.828
## KH2013:KH.C14.71            0.782 1.112152 0.564 0.970
## ADD1/2/3                     0.781 2.614835 0.562 0.636
##                               pct.2
## SDC/1/2/4                     0.407
## CTNNB1                        0.508

```

```

## FARP1/2                                0.169
## KH2013:KH.C6.26_GJA4                    0.763
## CD151                                    0.153
## KH2013:KH.C11.378_CLDN1/10/14/19/2/3/4/5/6/7/9 0.407
## FOXH1                                    0.153
## KH2013:KH.C7.805_ID1/2/3/4             0.508
## KH2013:KH.L154.1_LRP5/6               0.119
## MAP1LC3C                                0.119
## LAMB1/2/3/4                             0.441
## Ci-Coll12A1                             0.458
## KH2013:KH.L20.63                       0.983
## KH2013:KH.C1.738_CG9550               0.237
## TIE1/2                                  0.983
## CDH1/13/15/2/3/4                      0.237
## ARVCF                                    0.102
## CFL1/2                                  0.610
## KH2013:KH.C14.71                      0.898
## ADD1/2/3                               0.153

```

```

write.table(which.cells(hpfall.remv1, c(8, 9, 11)), "contam.cellname.txt")
write.table(contam.marker, "contam.marker.txt", row.names = T, col.names = NA,
  sep = "\t")

# Remove contamination and mesenchymal cells
hpfall.remv2 = subsetData(hpfall.remv1, which.cells(hpfall.remv1, c(0:7, 10,
  13)), do.scale = F)
hpfall.remv2

```

```

## An object of class seurat in project allhpf
## 14864 genes across 881 samples.

```

```

# Restore hpf labels
hpfall.remv2@ident = factor(substring(hpfall.remv2@cell.names, 1, 5))
names(hpfall.remv2@ident) = hpfall.remv2@cell.names

# Gene detected in each time point
boxPlot.FPKM(hpfall, "nGene", name.y = "Number of Genes", name.x = "", ratio.plot = 0.001,
  name = "Gene Detected")

```



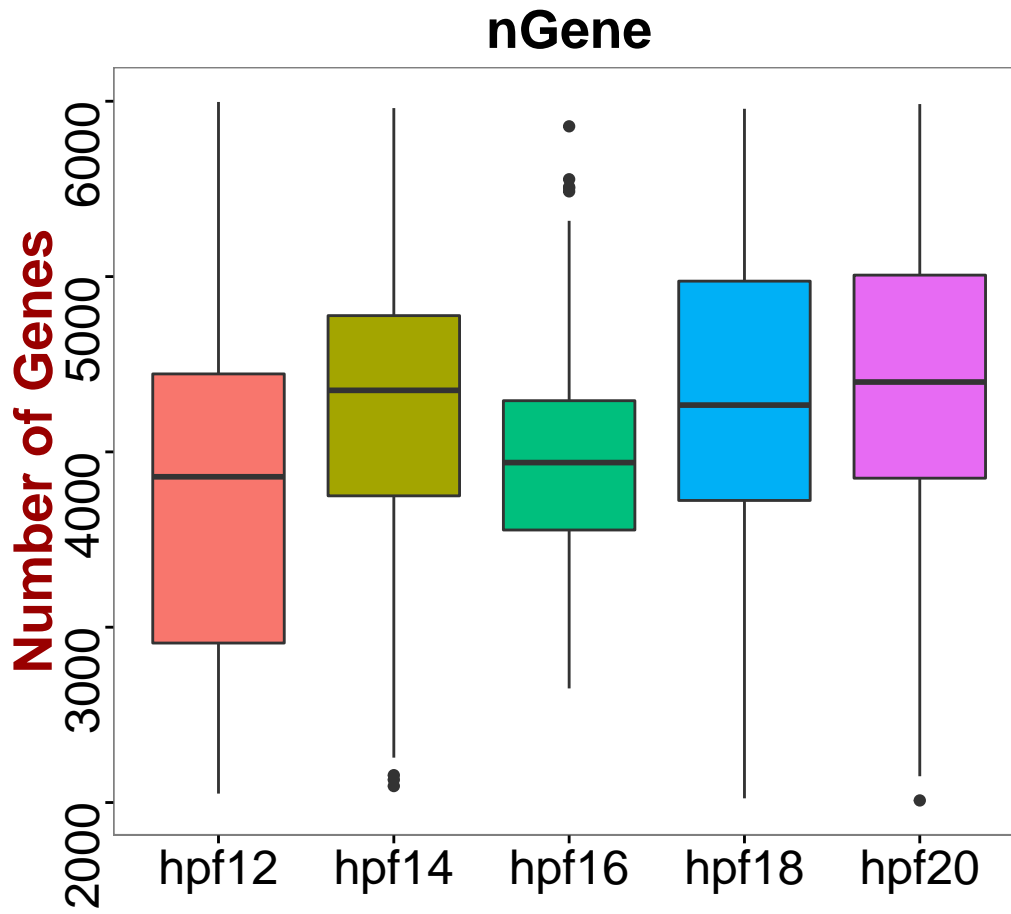

```
# Contamination cells are located  
save(hpfall.remv2, file = "hpfall.remv2.Robj")
```
